05 July 2019

1 Muscarinic modulation of spike-timing dependent plasticity at recurrent  
2 layer 2/3 synapses in mouse auditory cortex

3 Deepti Rao<sup>1</sup>, Megan B. Kratz<sup>2</sup>, and Paul B. Manis<sup>1,2</sup>

4

5 <sup>1</sup>Department of Cell Biology and Physiology, University of North Carolina at Chapel Hill,  
6 Chapel Hill, NC

7 <sup>2</sup>Department of Otolaryngology/Head and Neck Surgery, University of North Carolina at  
8 Chapel Hill, Chapel Hill, NC

9 \* Correspondence: Paul B. Manis, Ph.D., Department of Otolaryngology/Head and Neck Surgery, B027  
10 Marsico Hall, CB#7070, 125 Mason Farm Road, Chapel Hill, NC 27599-7070, Tel: (919) 843-9318, Email:  
11 pmanis@med.unc.edu

12 .

13 Keywords: calcium, back-propagation, acetylcholine, long-term potentiation, long-term  
14 depression, NMDA receptors

15

16 **Abstract**

17 Cholinergic systems contribute to the refinement of auditory cortical receptive fields by  
18 activating muscarinic acetylcholine receptors (mAChRs). However, the specific cellular and  
19 synaptic mechanisms underlying acetylcholine's effects on cortical circuits are not fully  
20 understood. In this study, we investigate the effects of muscarinic receptor modulation on  
21 spike-timing dependent plasticity (STDP) at synapses onto layer 2/3 pyramidal neurons in  
22 mouse auditory cortex (AC). Synapses onto layer 2/3 pyramidal neurons exhibit a STDP  
23 rule for pairing of postsynaptic spike bursts with single presynaptic stimuli. Pre-before-post  
24 pairing at +10 ms results in a timing-dependent long-term potentiation (tLTP), whereas pre-  
25 before-post pairing at +50 ms intervals, and post-before-pre pairing at -10 to -20 ms  
26 produce a timing-dependent long-term depression. We also characterize how mAChR  
27 activation affects plasticity at these synapses, focusing on the induction of tLTP. During pre-  
28 before-post pairing at +10 ms, mAChR activation by either carbachol or oxotremorine-M  
29 suppresses tLTP. mAChR activation also reduces the NMDA-receptor dependent  
30 synaptically evoked increase in calcium in dendrites, apparently without affecting  
31 presynaptic transmitter release. Pharmacological experiments suggest that M1 and M3  
32 receptors are not involved in the mAChR-mediated suppression of tLTP. Taken together,  
33 these results suggest activating mAChRs in layer 2/3 intracortical circuits can modify the  
34 circuit dynamics of AC by depressing tLTP mediated by NMDA receptors, and depressing  
35 calcium influx at excitatory synapses onto layer 2/3 pyramidal cells.

36

37

## 38 **Introduction**

39 Experience-dependent plasticity contributes to organizing the representation and  
40 processing mechanisms of sensory information in auditory, visual and somatosensory  
41 cortices (Allen et al. 2003; Chang and Merzenich 2003; Hubel and Wiesel 1965; Kotak et  
42 al. 2007; Rao et al. 2010; Takesian et al. 2012; de Villers-Sidani et al. 2007; Xu et al. 2007).  
43 Information about the context and behavioral significance of sensory information is provided  
44 in part by the activity of neuromodulatory systems. In the auditory system, these systems  
45 are critical for shaping experience-dependent plasticity of sensory representations (Kilgard  
46 1998; Metherate et al. 2005; Metherate and Weinberger 1989; Weinberger 2015; Zhang et  
47 al. 2005). At a cellular level representational plasticity is hypothesized to depend on  
48 correlations between pre and postsynaptic activity, and to require long-term potentiation  
49 (LTP) and depression (LTD) of synapses (Buonomano and Merzenich 1998). Although  
50 there are many demonstrations that neuromodulation can engage or prevent  
51 representational plasticity in neocortex, the mechanisms by which changes to synaptic  
52 strength are regulated by specific modulators are not well understood.

53 In the primary auditory cortex (A1), intracortical and thalamic inputs combine to  
54 determine the sensory responses of individual neurons (Intskirveli et al. 2016; Kaur et al.  
55 2005; Liu et al. 2007; Winkowski and Kanold 2013). Part of the intracortical circuit in layer  
56 2/3 is formed by the horizontal axons of layer 2/3 pyramidal cells, which can link columns of  
57 neurons with different frequency tuning (Clarke et al. 1993; Matsubara and Phillips 1988;  
58 Ojima et al. 1991; Read et al. 2002; Song et al. 2006; Watkins et al. 2014). Physiological  
59 studies have shown that layer 2/3 pyramidal neurons have broad sub-threshold receptive

60 fields (Kaur et al. 2004; Liu et al. 2007; Ojima 2002), and receive inputs tuned to a wide  
61 range of frequencies, even on adjacent spines (Chen et al. 2011). The convergence of  
62 inputs across the tonotopic map could play an important role in integrating responses to  
63 spectrotemporally complex stimuli commonly encountered in the acoustic environment,  
64 such as frequency modulated sounds or sounds with harmonic structures (Harper et al.  
65 2016; Kadia and Wang 2003; Kratz and Manis 2015), and can create a substrate for a  
66 flexible activity-dependent plasticity of suprathreshold sensory responses and neurons  
67 sensitive to multiple acoustic features (Atencio and Sharpee 2017; Harper et al. 2016).

68 Plasticity of sensory representations has been associated with spike timing-dependent  
69 plasticity (STDP) in vivo in auditory, visual and somatosensory cortices (D'amour and  
70 Froemke 2015; Dahmen et al. 2008; Jacob et al. 2007; Larsen et al. 2010; Martins and  
71 Froemke 2015; Yao and Dan 2001). STDP involves changes in strength of synapses that is  
72 dependent upon the precise timing of pre- and postsynaptic activity (Bi and Poo 1999;  
73 Markram 1997). Most commonly, presynaptic activity that precedes postsynaptic firing by  
74 tens of milliseconds can increase synaptic strength (timing-dependent LTP; tLTP), whereas  
75 reversing this temporal order can weaken synaptic strength (timing-dependent LTD; tLTD).  
76 tLTP largely relies on the interplay between NMDA receptor activation and the timing of  
77 back-propagating action potentials in the dendrites of the postsynaptic neuron (Linden  
78 1999; Magee and Johnston 1997; Sourdet 1999) , whereas tLTD can result either from  
79 postsynaptic NMDA receptor activation (Karmarkar et al. 2002) or from a cascade involving  
80 postsynaptic metabotropic glutamate receptors and presynaptic cannabinoid receptors  
81 (Bender 2006; Nevian and Sakmann 2006). The temporal shape and direction of the STDP  
82 window varies with brain region, cell and synapse type (Larsen et al. 2010).

83       Activation of cholinergic receptors has been widely implicated in the modulation of  
84       tonotopic map plasticity in auditory cortex. Pairing acoustic stimuli with electrical stimulation  
85       of nucleus basalis, which provides cholinergic innervation of the cortex, alters the  
86       subsequent representation of the stimulus (Froemke et al. 2007; Kilgard 1998; Weinberger  
87       2003). Muscarinic cholinergic receptors (mAChRs) have been shown to modulate sensory  
88       responses as well as transmission at both excitatory and inhibitory synapses in auditory  
89       cortex (Atzori et al. 2005; Bajo et al. 2014; Flores-Hernandez et al. 2009; Kuchibhotla et al.  
90       2017; Metherate and Ashe 1991, 1995; Metherate and Weinberger 1990). mAChRs also  
91       play a crucial role in the development and function of the normal auditory cortex. Absence  
92       of mAChRs leads to a distorted tonotopic map and a decrease in tonotopic map plasticity  
93       (Zhang et al. 2006). Attenuation of cholinergic inputs to cortex disrupts auditory spatial  
94       perception and plasticity (Leach et al. 2013) and performance of a learned task when  
95       performing in an active, but not passive, context (Kuchibhotla et al. 2017). Even though the  
96       cholinergic system plays an important role in auditory cortex, it remains unclear how  
97       acetylcholine influences tLTP and tLTD at cortical synapses, and which classes of receptors  
98       mediate specific effects.

99       In this study, we investigated the timing rules of STDP and their modulation by one set  
100       of receptors activated by cholinergic system, the muscarinic receptors, at recurrent  
101       synapses in layer 2/3 of the mouse auditory cortex. We find that the STDP in auditory cortex  
102       follows unique timing rules, in which tLTP occurs at +10 ms (presynaptic EPSP leading  
103       postsynaptic spikes), while tLTD occurs at both -10 and +50 ms. Activation of mAChRs  
104       modulates the timing rules. The muscarinic agonists carbachol and oxotremorine-M gate  
105       tLTP induction at +10 ms and also decrease NMDA receptor currents in layer 2/3 cells. The  
106       tLTP depends on increases in intracellular calcium, and during pairing of presynaptic and

107 postsynaptic activity with a +10 ms delay, carbachol application results in a decrease in  
108 action potential evoked postsynaptic calcium influx, as well as a decrease in the summed  
109 action potential and synaptic calcium influx, an effect that is likely caused by the reduction in  
110 NMDAR currents. We conclude that layer 2/3 synapses in auditory cortex exhibit STDP, and  
111 that this plasticity can be modulated through a postsynaptic mechanism by activation of  
112 muscarinic cholinergic receptors.

### 113 **Materials and Methods**

114 The experiments reported here were performed in two groups. The first set of  
115 experiments was performed from 2008-2011, and a second set of experiments was  
116 performed from 2015-2016. All protocols were performed according to methods approved  
117 by the Institutional Animal Care and Use Committee of the University of North Carolina,  
118 Chapel Hill. Thalamocortical brain slices of the auditory cortex were prepared from young  
119 CBA/CaJ mice (P10–P22; most were in the range P13-17; ), following procedures  
120 previously described (Cruikshank et al. 2002; Kratz and Manis 2015; Rao et al. 2010). Mice  
121 of either sex were used in both the first and second set of experiments. Sex was  
122 undetermined except in a small subset of mice used in the second set of experiments, and  
123 those sex determinations are indicated in the text.

124 To prepare brain slices, mice were first anesthetized with 100 mg/kg ketamine, 10  
125 mg/kg xylazine, and decapitated when areflexic. The brain was trimmed, and slices were  
126 cut in a chilled solution at an angle of +15 degrees from the horizontal plane, so as to  
127 include A1 and key landmarks of the thalamocortical pathway. The rostral-caudal axis of  
128 these slices is approximately parallel to the tonotopic axis of the primary auditory region.  
129 Because of variability in the organization of the auditory cortical map in mouse (Issa et al.

130 2014; Tsukano et al. 2015), no attempt was made to limit recordings from a given tonotopic  
131 area; thus data are pooled from recordings made in both “primary” and “shell” slices,  
132 following the prior description (Cruikshank et al. 2002). Consequently, the recording sites  
133 are referred to here as auditory cortex (AC), and we reserve the use of the term A1 to  
134 specifically reference prior *in vivo* work where precise knowledge of the cortical fields is  
135 available. The standard slicing, incubation, and recording solution was an artificial  
136 cerebrospinal fluid (ACSF) that contained (in mM) 134 NaCl, 3.0 KCl, 2.5 CaCl<sub>2</sub>, 1.3 MgCl<sub>2</sub>,  
137 1.25 KH<sub>2</sub>PO<sub>4</sub>, 10 glucose, 20 NaHCO<sub>3</sub>, 0.4 ascorbic acid, 2 sodium pyruvate, and 3  
138 myoinositol; this solution was saturated with 95%O<sub>2</sub>/5%CO<sub>2</sub>. In the early experiments, the  
139 slices were incubated at 34°C during a 1-hour recovery period, whereas in the later  
140 experiments, slices were incubated at 34°C for a 15-minute period. In both sets of  
141 experiments, slices were subsequently maintained at room temperature until used (> 1 hr  
142 after slice preparation).

143 *Recording and stimulation.* The recording and stimulating arrangements are illustrated  
144 in Figure 1. During recording, single cells were visualized with infrared interference contrast  
145 optics or asymmetric illumination, and recorded using patch pipettes in current-clamp, or in  
146 a subset of experiments investigating NMDA receptor function, in voltage-clamp. A  
147 concentric bipolar stimulating electrode (Fredrick Haer, #CBBB75, 75µM diameter) was  
148 placed in layer 2/3 in AC, 500-700 µm caudal or rostral to the recording site (Figure 1A).  
149 EPSPs were evoked by computer-generated monophasic 100 µsec pulses delivered  
150 through an optically isolated analog stimulator (Dagan S940 and S910 isolation unit)  
151 through the stimulating electrode. Cortical pyramidal cells in auditory cortex layer 2/3 were  
152 identified on the basis of their position (Figure 1A) and electrophysiological (Figure 1B)

153 criteria (Rao et al. 2010). Fast-spiking cells (interneurons) were identified based on spike  
154 width and firing rate, and were excluded in this study. All recordings were performed using  
155 whole-cell tight seal methods at 34°C.

156 *Current Clamp Recordings and STDP Protocols.* Recording pipettes were pulled from  
157 1.5 mm KG-33 glass and backfilled with an intracellular solution containing (in mM) 130 K-  
158 gluconate, 4 NaCl, 0.2 EGTA, 10 HEPES, 2 Mg<sub>2</sub>ATP, 0.3 Tris GTP, and 10  
159 phosphocreatine (pH 7.2 with KOH), and 290 mOsm. In a few experiments in the second  
160 group, the pipette Mg<sub>2</sub>ATP was 4 mM; no differences in STDP or cell excitability were  
161 evident however. In one set of experiments, the electrode solution was supplemented with  
162 10 mM BAPTA. Cells were first briefly characterized with a current-voltage pulse protocol to  
163 confirm firing patterns and cell health. Next, thresholds for action potential generation were  
164 evaluated for 2-5 ms current pulses. Baseline excitatory postsynaptic potentials (EPSPs)  
165 were evoked every 10 seconds by stimulating in layer 2/3 with 100 µsec shocks to activate  
166 presynaptic fibers. The amplitudes of the EPSPs were targeted to be 5-8 mV in the first set  
167 of experiments, and 2-3 mV in the second set of experiments. During the STDP induction  
168 protocols, the postsynaptic cell was also stimulated with a 5-pulse train at 125 Hz of 1-3 nA  
169 depolarizing current pulses, 2-5 ms in duration, to generate a train of 5 action potentials with  
170 a fixed delay with respect to the presynaptic stimulation. The high-frequency burst was used  
171 to maximize the generation of an AP-induced calcium influx over a wide area of the  
172 dendritic tree. The induction protocol consisted of 100 presentations of the EPSP-AP burst  
173 combination, at an interval of 1/s. During the induction protocol for pre-before-post pairing,  
174 the spike-EPSP was measured from the onset of the evoked EPSP to the peak of the first  
175 postsynaptic action potential. For post-before-pre pairing, the timing was measured from the



176 peak of the 5th action potential to the onset of the EPSP (Nevian and Sakmann 2006). The  
177 timing is indicated in the insets of Figure 2.

178 Following the induction protocol, EPSPs were monitored every 10 seconds for the next  
179 30-40 minutes. EPSPs frequently had a compound appearance with inflections on both the  
180 rising and falling phases, suggesting the activation of multiple inputs or polysynaptic  
181 pathways. To focus on synaptic inputs that were most likely to be monosynaptic and not  
182 contaminated with polysynaptic events, the maximal slope of the first 2-3 ms of the EPSP  
183 was measured. The EPSP slopes were averaged in 1-minute blocks (6 sequential trials).  
184 The EPSP slope ratio ( $S/S_0$ ) for each cell was then computed as the ratio of the mean  
185 EPSP slope 20–40 min after the induction protocol ( $S$ ) to the mean slope measured during  
186 the 5-min baseline prior to induction protocol ( $S_0$ ). Cells were retained for analysis if they  
187 had resting membrane potentials negative to -60 mV, exhibited regular firing, showed less  
188 than an 8-mV shift in resting membrane potential during the protocol, and were stable for at  
189 least 30 minutes after the induction protocol. Fast-spiking cells, and one cell with a very  
190 high adaptation ratio that was tested with a +10 ms interval in eserine were excluded from  
191 further analysis. In addition, cells that showed a coefficient of variation of EPSP slope  
192 (measured as the standard deviation/mean of the 1-minute averaged EPSPs)  $> 0.30$  during  
193 the baseline period were excluded when analyzing the STDP data.

194 To assess the effect of mAChR activation in these experiments, a cholinergic agonist  
195 (20  $\mu$ M carbachol or 3  $\mu$ M oxotremorine-M) was applied. In the first set of experiments, a  
196 computer-controlled valve delivered the agonist to the bath from 2 minutes before to 1  
197 minute after the onset of the induction protocol, for a total duration of 5 minutes. In the  
198 second set of experiments, a manually switched valve began delivery 3 minutes before, and

199 returned to ACSF immediately after the induction protocol, for a total agonist delivery  
200 duration of 5 minutes. In these pharmacological experiments, the baseline was limited to the  
201 first 3 minutes, to prevent agonist application from interfering with the baseline measure.  
202 Because the solutions took ~1 minute to reach the chamber, and ~1 minute to fully  
203 exchange with the solution in the chamber, the slice was exposed to the agonists from just  
204 before the beginning until the end of the induction protocol with the agonist at full  
205 concentration in both sets of experiments, and the agonist was washed out of the slice  
206 afterwards. When antagonists were used, they were present in the solution for the entire  
207 duration of the recording, including while agonists were applied.

208       The effects of mAChR activation on basal synaptic transmission and cell excitability  
209 were measured in separate experiments, without an STDP induction protocol. In these  
210 experiments, single shocks to layer 2/3 were delivered at 0.1 Hz, and solution exchange  
211 was performed as for the STDP measurements. The cell's firing rate versus injected current  
212 (FI) relationship was measured immediately before the baseline EPSP measurements were  
213 taken, and repeated at the end of the baseline period, immediately after the agonist delivery  
214 was discontinued, and at the end of the recording period. FI curves took 2 minutes to  
215 acquire.

216       FI curves were measured using a series of 500-ms duration current pulses with 20-50  
217 pA steps up to a maximum of 200-400 pA. The firing frequency (F) at each current level (I),  
218 was parameterized by fitting the curve up to the maximum firing rate (thus excluding traces  
219 with depolarization block) to the following function:

$$F(I)_{I \leq I_{\text{break}}} = F_0 + I * F_1 / I_{\text{break}} \quad \text{Eq. 1}$$

$$F(I)_{I > I_{\text{break}}} = F_2 * (1 - \exp(-(I - I_{\text{break}}) / I_{\text{rate}})) + (F_0 + F_1)$$

220 Here,  $F(I)$  is the firing rate (in spikes per second) measured with a current step of  
221 amplitude  $I$  (in pA),  $F_0$  is the firing rate in the absence of current (spikes per second),  $I_{\text{break}}$   
222 (in pA) defines the breakpoint that separates the near-threshold linear region of the FI curve  
223 from the exponentially rising portion and is the threshold current for firing,  $F_1$  is the firing  
224 rate at  $I_{\text{break}}$ ,  $F_2$  is the increase in firing rates when the current exceeds  $I_{\text{break}}$ , and  $I_{\text{rate}}$  is  
225 the rate of change during the exponentially increasing phase of firing with current level  
226 (units of pA). Fitting used the sequential least squares programming method (SQSLP) from  
227 the Python library `scipy.optimize` (version 0.15.1, [www.scipy.org](http://www.scipy.org)). Eq. 1 parameterizes key  
228 measures of the FI curve, including the threshold for firing, the rate at which the firing rate  
229 changes with current (the slope), and the maximum firing rate, which facilitates comparison  
230 between experimental treatments. For the fits here, we held  $F_0$  and  $F_1$  at 0. Fits were  
231 compared for the FI curves taken immediately before drug application, and immediately  
232 after drug application. The final FI curves after washout of the drugs were not analyzed  
233 because activation of mAChRs can result in long-term activation of protein kinases and  
234 phosphatases, producing effects that do not completely wash out.

235 *Voltage clamp recordings.* In a subset of experiments, cells were voltage-clamped to  
236 isolate and measure NMDA receptor-dependent currents. For these experiments, the slices  
237 were perfused with a modified oxygenated ACSF (as above) with the following changes.  
238 Calcium and magnesium were increased to 4 mM each, AMPA receptors were blocked with  
239 10  $\mu\text{M}$  CNQX, and GABA receptors were blocked with 50  $\mu\text{M}$  picrotoxin. These conditions

240 pharmacologically isolate the NMDAR-mediated currents while minimizing polysynaptic  
241 transmission (Philpot et al. 2001a, 2001b). Recording pipettes were pulled from 1.5 mm  
242 KG33 glass, and the tips were coated with Sylgaard 184 (Dow Corning) to reduce  
243 capacitance. Electrodes were filled with an internal solution containing (in mM): 120 cesium  
244 methanesulfonate, 8 TEA-chloride, 10 HEPES, 0.2 EGTA, 4 tris-adenosine triphosphate,  
245 0.3 tris-guanosine triphosphate, 10 creatinine phosphate, and 3 QX-314 chloride with pH  
246 adjusted to 7.2 and osmolarity adjusted to 300 mOsm with sucrose. The internal solution  
247 also contained 50-100  $\mu$ M AlexaFluor 488 for post-hoc identification of pyramidal neurons.  
248 Pipette capacitive transients were minimized prior to breaking in, and after break-in whole  
249 cell capacitance and series resistance compensation was applied [Rs, mean=16.6 (SD 4.8)  
250 M $\Omega$ , compensation, mean=41.4 (SD 12.7) %]. Cells were stepped to +40 mV when  
251 measuring NMDA currents, and the difference between traces with and without stimulation  
252 in layer 2/3 was computed to isolate the synaptic current from the residual outward  
253 potassium currents. The residual potassium current was 570 (SD 124) pA (range: 375-846  
254 pA), and the cell voltage after estimating the drop across the series resistance of the  
255 electrode was calculated to be +30.8 (SD 5.5) mV. Current traces were low-pass filtered at  
256 2 kHz. The stimulus intensity was adjusted to evoke 100-500 pA EPSCs while the cells  
257 were depolarized. Stimuli were delivered either as single shocks, every 8 sec, or in 7 of the  
258 13 tested cells, as pairs of shocks 50 ms apart to measure the paired-pulse ratio. Ten  
259 traces were averaged for each measurement.

260 *Electrophysiology Data Acquisition and Analysis.* Data for experiments performed in  
261 2008-2011 were acquired using a custom MATLAB program (R2008-R2018, The  
262 Mathworks, Natick, MA). Data for the calcium imaging experiments from that series, and for

263 the experiments performed in 2015-2016, were acquired using the Python program ACQ4  
264 (Campagnola et al. 2014), available at <http://www.acq4.org>.

265 Data were analyzed using MATLAB, ACQ4, Python scripts, Igor Pro (6.2 Wavemetrics,  
266 Oswego, OR) and Prism 6.0 and 7.0 (Graphpad, San Diego, CA). The analysis pipeline  
267 involved multiple steps. For the STDP and pharmacological measurements of the first data  
268 set, MATLAB scripts were used to generate tables of the 1-minute binned EPSP slope time  
269 courses that were organized and stored in Excel (Microsoft, V14.6.4) spreadsheets. Data  
270 from the second set of experiments were analyzed in ACQ4, and the resulting 1-minute  
271 binned EPSP slope time courses were saved as text files and added to the same Excel  
272 sheets. The Excel sheets were subsequently read using a Python script to combine cells  
273 and analyze groups using uniform metrics. For analysis of intrinsic excitability, the analyses  
274 used Python scripts that directly read the original (raw) data from both MATLAB and ACQ4  
275 files, and then performed identical processing for both early and late data sets.

276 *Calcium Imaging.* Calcium imaging was performed in cells under current clamp, using  
277 conditions that closely matched those used during the spike-timing protocol; however, we  
278 did not attempt to induce or measure plasticity. In the first set of experiments, pipettes (1.5  
279 mM KG33) were filled with intracellular solution supplemented with the low-affinity calcium-  
280 indicator Fluo-5F (Life Technologies, 100  $\mu$ M). Fluo-5F has a reported  $k_d$  for  $Ca^{2+}$  of  $\sim 0.70$   
281  $\mu$ M in 1 mM  $Mg^{2+}$  at 30°C (Woodruff et al. 2002), or 2.3  $\mu$ M at 22°C (ThermoFisher product  
282 data sheet for catalog number F14221;  $Mg^{2+}$  concentration not specified). As our  
283 experiments were performed with 2 mM  $Mg^{2+}$  in the pipette, the  $k_d$  is likely higher than 0.70  
284  $\mu$ M. When using Fluo-5F, AlexaFluor 568 (50  $\mu$ M) was included in the pipette solution to  
285 reveal neuronal morphology. In the second set of experiments, a higher affinity indicator,

286 Asante Calcium Red (ACR, TEFLabs, Austin, TX; 100  $\mu\text{M}$ ) was used in a non-ratiometric  
287 mode. This indicator has a reported  $k_d$  for  $\text{Ca}^{2+}$  of  $\sim 0.53 \mu\text{M}$  in 1 mM  $\text{Mg}^{2+}$  at 22°C (Hyrz et  
288 al. 2013), and 0.4  $\mu\text{M}$  in 0  $\text{Mg}^{2+}$  (TEFLabs product information). ACR was used in  
289 conjunction with Lucifer Yellow-CH (potassium salt) (<0.5%) for cell identification. Imaging  
290 and recording took place on a Zeiss FS-2 microscope under a 40X 0.75NA water immersion  
291 objective. Subsequent to whole-cell break-in, cells were monitored for a minimum of 15 min  
292 to allow diffusion of the dyes into the dendrites before fluorescence measurements were  
293 taken. Voltage and fluorescent signals were measured simultaneously. To generate EPSPs,  
294 an extracellular stimulation pipette filled with ACSF was placed within 20  $\mu\text{m}$  of a proximal  
295 apical dendrite (50-100  $\mu\text{m}$  from the soma) in layer 2/3 neurons. Episodic evoked  
296 fluorescence measurements were made over 5 min in ACSF, as well as during and  
297 following bath application of 20  $\mu\text{M}$  carbachol. In the early experiments, fluorescent  
298 illumination was provided by a 100W halogen light source, and a Sutter Lambda-2 filter  
299 wheel controlled the selection of excitation filters and provided shuttering. In the later  
300 experiments, illumination was provided by LEDs (470 nm for Fluo-5F and 530 nm for ACR;  
301 Thorlabs) controlled by an analog pulse from the computer. Imaging of Fluo-5F and Lucifer  
302 Yellow used a Chroma 480/40 nm bandpass excitation filter, a Q505LP dichroic mirror, and  
303 HQ510LP long-pass emission filter. Imaging of the AlexaFluor 568 and ACR used a  
304 HQ545/30 bandpass filter for excitation, a Q570LP dichroic mirror, and a HQ610/75 nm  
305 bandpass filter. A Photometrics QuantEM 512-SC CCD camera was used to image the cells  
306 and measure fluorescence transients. Imaging of soma and dendrites were carried out at  
307  $\sim 93$  frames/second, using 8X8 binning. Illumination was provided only during the recording  
308 periods to minimize bleaching and potential photodynamic damage. Fluorescence imaging  
309 and electrophysiological recordings were synchronized in hardware. Each voltage trace

310 consisted of baseline period of at least 50 ms, followed optionally by local fiber stimulation  
311 or evoked APs, and continued for 2.5-3 seconds. Four stimulus conditions (EPSP alone,  
312 postsynaptic action potential stimulation alone, and combined EPSP and action potential  
313 stimuli with +10 and +50 ms intervals) were interleaved every 5-7 seconds throughout the  
314 protocol, including during and following drug delivery. As no clear calcium signals were  
315 detected under the EPSP-alone condition, those traces were used to compute a linear  
316 bleaching correction estimate that was applied to the traces for all other conditions.

317 A single structural image was obtained from the AlexaFluor 568 or Lucifer Yellow  
318 fluorescence before and after each run, and used to place ROIs along the visible primary  
319 apical dendrite and along the proximal regions of the first secondary branches. Changes in  
320 fluorescence,  $\Delta F/F = (F(t)-F_0)/F_0$ , where  $F_0$  is the baseline fluorescence prior to stimulation  
321 and  $F(t)$  is the time course of the fluorescence change) were then computed, and  
322 summarized as the area under the curve of the evoked calcium-dependent fluorescent  
323 signal. Fluorescence traces for bursts of action potentials, with or without preceding EPSPs,  
324 are averages of ~10 traces measured with the same ROI. Off-line data analysis for the  
325 imaging was carried out using Python scripts under ACQ4. Traces with spontaneous action  
326 potentials before or after the stimulus train, EPSP-evoked action potentials, or inconsistent  
327 AP production during the train, were excluded from analysis. Under our optical conditions,  
328 dendritic spines were not clearly resolved in the binned images, in which each pixel was a  
329  $2 \times 2 \mu\text{m}$  square. Consequently, the reported measurements are likely dominated by the  
330 larger fluorescence signals from the dendritic shaft, with a smaller contribution from spine  
331 calcium signals. All of the ROIs for a given cell were scanned to determine which one  
332 showed the largest increase in the calcium signal when comparing the +50 ms EPSP-AP



333 condition with the APs alone, as described in the results. This ROI was then used for all  
334 further analysis for a given cell.

335 *Chemicals and Pharmacological Agents.* Carbachol, eserine, oxotremorine-M,  
336 pirenzepine, 4-DAMP, D-APV, CNQX, VU-0255035, and BAPTA were purchased from  
337 Tocris. AlexaFluor 568, Lucifer Yellow CH, and Fluo-5F were purchased from Molecular  
338 Probes and Invitrogen. Asante Calcium Red was purchased from TEFLABS. All other  
339 chemicals were purchased from Sigma-Aldrich.

340 *Statistical Analysis.* Data are reported and plotted as means and sample SD. Statistical  
341 comparisons were made using one or two-way ANOVA (with post-hoc tests using Holm-  
342 Sidak's multiple comparison corrections when specific subsets of observations are  
343 compared, or Tukey's when all observations are being compared), paired or unpaired two-  
344 tailed t tests or single-sample t-tests (when comparing an effect at a within-cell basis for a  
345 single experimental group) as appropriate. All t tests used Welch's correction and assumed  
346 unequal variances (Ruxton 2006). Comparisons of intrinsic parameters used a multivariate  
347 analysis of variance (MANOVA). Analysis of the calcium signals used a linear mixed-effects  
348 model fit by maximum likelihood, followed by multiple comparisons of means using Tukey  
349 contrasts. Statistics were computed using Prism (V6.0 and 7.0; two-way ANOVAs and one-  
350 way t-tests), scipy.stats (V0.17.1; t-tests with Welch's correction), and R (V3.3.1; multiple  
351 ANOVA, linear mixed-effects models; (R Development Core Team 2018)). Statistics are  
352 reported with degrees of freedom, the value of the statistic if available, the p value, the  
353 number of cells (the unit of analysis) and the number of mice from which the cells were  
354 obtained. Statements of statistical significance are based on  $p < 0.05$ , but exact p values are  
355 reported.

356



357 **Results**

358 As indicated in the methods, the results reported here were obtained from two sets of  
359 experiments performed in different time frames by different investigators. Although most of  
360 the experimental conditions for the two sets of experiments were identical (mouse strain,  
361 anesthesia, slice preparation methods, bath solutions, electrode solutions, and  
362 temperature), the stimulation levels used in the two sets of experiments resulted in different  
363 amplitude EPSPs. In the first sets of experiments, baseline EPSPs (averaged across all  
364 cells in a single experimental condition, for the first 5 minutes of recording) averaged 7.1  
365 mV (SD 1.5 mV; N = 24 conditions, range 4.6-10.5 mV). In the second set of experiments,  
366 baseline EPSPs across experimental groups were on average smaller at 3.1 mV (SD 1.1  
367 mV; N = 12 conditions, range 0.9-4.8 mV). The baseline EPSP amplitudes were significantly  
368 different ( $t_{29.8} = 9.25$ ,  $p=0.0001$ , two-tailed t-test with Welch's correction), as were the initial  
369 EPSP slopes ( $t_{23.2} = 6.78$ ,  $p=0.0001$ ).

370 *Spike timing-dependent plasticity at layer 2/3 synapses in AC*

371 STDP was induced by pairing EPSPs generated from stimulation in layer 2/3 with  
372 postsynaptic action potentials evoked by direct current injection through the recording  
373 electrode. Baseline EPSPs were monitored by stimulating at 0.1Hz. After 5 minutes of  
374 baseline stimulation, the STDP induction protocol was presented, after which EPSPs were  
375 monitored at 0.1 Hz for 30-40 minutes. The induction protocol consisted of an EPSP paired  
376 with 5 action potentials at 125 Hz, repeated 100 times at 1 Hz. In control experiments, only  
377 presynaptic EPSPs were elicited, only postsynaptic action potentials were elicited, or no  
378 stimulation was used during the induction protocol. The timing between the EPSP and the  
379 first (for pre-before-post pairing) or last (for post-before-pre pairing) action potential was

380 varied to investigate timing-dependent plasticity rules. In layer 2/3 neurons, pairing of  
381 EPSPs with postsynaptic spikes resulted in bidirectional plasticity that depended on the  
382 EPSP-spike timing. Synaptic plasticity was measured by comparing the mean slope of the  
383 rising phase of the EPSP measured from 20-40 minutes after the induction protocol to the  
384 baseline slope determined from the 5 minutes prior to the pairing ( $S/S_0$ ). When spikes  
385 preceded the EPSP by 20 ms (-20 ms), no tLTP or tLTD was observed (Figure 2A, B; mean  
386  $S/S_0=0.885$  (SD 0.218),  $t_5=-1.184$ ,  $p=0.29$ ,  $N=6$  cells from 4 mice, one-sample t-test). When  
387 spikes preceded the EPSP by 10 ms (-10 ms), a significant tLTD was observed (Figure 2C,  
388 D; mean  $S/S_0=0.750$  (SD 0.076),  $t_4=-6.611$   $p=0.0027$ ,  $N=5$  cells from 4 mice). On the other  
389 hand, when the onset of EPSPs preceded spikes by 10 ms (+10 ms), tLTP was induced  
390 (Figure 2E, F; mean  $S/S_0=1.457$  (SD 0.369),  $t_8=3.507$ ,  $p=0.008$ ,  $N=9$  cells from 9 mice). No  
391 synaptic plasticity resulted when the interval between EPSP and spikes was +20 ms (Figure  
392 2G, H; mean  $S/S_0=0.984$  (SD 0.363),  $t_6=-0.096$ ,  $p=0.93$ ,  $N=7$  cells from 7 mice). In contrast,  
393 EPSPs preceding spikes by 50 ms (+50 ms) resulted in tLTD (Figure 2I, J; mean  
394  $S/S_0=0.605$  (SD 0.197),  $t_4=-4.006$ ,  $p=0.016$ ,  $N=5$  cells from 4 mice). A separate group of  
395 cells was tested at +10 ms in the second set of experiments (Figure 3A, unfilled circles at  
396 +10 ms), slightly weaker stimulation that resulted in smaller EPSPs (mean 4.79 mV  
397 (SD=1.33),  $S/S_0=2.67$  (SD 1.364),  $N = 6$  cells) compared to the EPSPs in the first data set  
398 (mean 5.66 mV (SD=1.91),  $N=9$ ) (filled circles, Figure 3A at +10 ms). Although the second  
399 group did not show a statistically significant effect of the induction protocol (mean  
400  $S/S_0=1.716$  (SD 0.855),  $t_5=1.874$ ,  $p=0.12$ ,  $N=6$  cells from 2 mice; 4 male and 2 female), the  
401 mean effect size was larger than in the first group. Furthermore, no significant difference in

402 the EPSP slope ratios was observed between these two groups ( $t_{9.84}=-0.64$ ,  $p=0.544$ ;  
403 unpaired t-test with Welch's correction). Combining the two data sets still shows a  
404 significant effect at +10 ms (mean  $S/S_0=1.561$  (SD 0.625),  $t_{14}=3.361$ ,  $p=0.0047$ ,  $N=15$  cells  
405 from 11 mice). In subsequent comparisons, these two sets of measurements at +10 ms are  
406 used separately as controls for contemporaneous manipulations.

407 The resulting STDP curve is summarized in Figure 3A. The pairing of EPSPs and  
408 spikes had a significant interval-dependent effect (one-way ANOVA,  $F_{5, 40}=4.780$ ,  
409  $p=0.0035$ ). Although individual comparisons between baseline and post-STDP induction  
410 responses showed significant effects at +10, +50 and -10 ms, post-hoc comparisons  
411 between all intervals using Tukey's multiple comparison test showed that the +10 ms  
412 interval was significantly different from both the +50 ms interval ( $p=0.012$ ) and the -10 ms  
413 interval ( $p=0.049$ ); all other interval pairs had  $p$ -values  $>0.1$ . Although some run-down was  
414 visible, the presynaptic stimulation-only, postsynaptic action potentials-only and 0.1Hz  
415 control (Figure 3B) were not significantly different from their baselines (0.1Hz: mean=0.837  
416 (SD 0.182),  $t=-2.195$ ,  $p=0.080$ ,  $N=6$  cells from 4 mice; pre-only: mean=0.833 (SD 0.187),  
417  $t=-2.194$ ,  $p=0.080$ ,  $N=6$  cells from 5 mice; post-only=0.810 (SD 0.184),  $t=-2.537$ ,  $p=0.052$ ,  
418  $N=6$  cells from 4 mice). The general shape of the STDP curve is similar to the curves  
419 reported at other synapses, including the presence of tLTP at short positive intervals and  
420 evidence for a weaker tLTD at short negative intervals. The presence of tLTD at +50 ms  
421 appears to be an unusual feature. The LTP at +10 ms is associative, as the induction  
422 requires both specific timing and an appropriate temporal order between pre- and  
423 postsynaptic activity.

424 *mAChR activation induces LTD of synaptic potentials at layer 2/3 to layer 2/3 synapses in*  
425 *AC.*

426 Previously, it was shown that activation of mAChRs, via electrical stimulation in layer 6  
427 or the underlying white matter, induces a LTD of synaptic potentials in layer 3 pyramidal  
428 cells in AC (Kaur et al. 2005). To test whether mAChR activation at layer 2/3 to layer 2/3  
429 synapses causes LTD, we bath-applied the cholinergic receptor agonist carbachol (20  $\mu$ M)  
430 for 5 minutes while measuring EPSPs in layer 2/3 neurons. Carbachol induced a large  
431 transient depression of EPSPs during drug application (Figure 4A), to  $S/S_0=0.528$  (SD  
432 0.088) ( $t_5=-11.94$ ,  $p=0.000073$ ,  $N=6$  cells from 2 mice, one-sample t-test compared to the  
433 normalized baseline of 1.0), measured immediately after the drug application. EPSP  
434 amplitudes eventually returned to baseline over 20 minutes. We also tested the muscarinic  
435 receptor agonist oxotremorine-M (3 $\mu$ M; Oxo-M). Oxo-M (Figure 4B) also produced a  
436 significant transient depression (10-25 minutes to a mean  $S/S_0$  of 0.597 (SD 0.127),  
437  $t_4=-6.34$ ,  $p=0.0032$ ,  $N=5$  cells from 4 mice); when combined with the second set of  
438 experiments, the mean  $S/S_0$  was 0.632 (SD 0.166),  $t_4=-5.864$ ,  $p=0.00062$ ,  $N=8$  cells from 7  
439 mice; 2 cells were from 2 male mice; the remainder had undetermined sex). Endogenous  
440 activation of AChRs with eserine, a cholinesterase inhibitor (1 $\mu$ M) induced a weak transient  
441 depression of EPSPs but the effect was not significant (Figure 4C, mean  $S/S_0=0.812$  (SD  
442 0.188),  $t_5=-2.241$ ,  $p=0.075$ ,  $N=6$  cells from 4 mice). To further confirm that the carbachol-  
443 induced LTD measured at synapses in layer 2/3 requires activation of mAChRs rather than  
444 nicotinic acetylcholine receptors, the nonselective mAChR antagonist atropine was applied  
445 at 10  $\mu$ M, a concentration that blocks all mAChR subtypes (Peralta et al. 1987), prior to and

446 during the application of 20 $\mu$ M carbachol. Atropine blocked the transient depression  
447 produced by carbachol (Figure 4D, mean S/S<sub>0</sub> from 10-25 minutes = 0.883 (SD 0.107),  $t_2=-$   
448 1.543,  $p=0.27$ , N=3 cells from 2 mice). One member of the mAChR family, the M1  
449 receptors, are highly expressed in cortex (Hohmann et al. 1995; Ro  $\beta$  ner et al. 1993). We  
450 therefore next tested two M1 receptor antagonists, pirenzepine and specific M1 competitive  
451 antagonist VU0255035 (Sheffler et al. 2009) for their ability to block the effects of carbachol.  
452 Pirenzepine at 75nM, a concentration that blocks M1 receptors somewhat selectively  
453 (Buckley et al. 1989) did not prevent the depression produced by carbachol (Figure 4E,  
454 mean S/S<sub>0</sub>=0.550 (SD 0.155),  $t_3=-5.04$ ,  $p=0.015$ , N=4 cells from 2 mice). Because  
455 VU0255035 was solubilized in DMSO prior to addition to the ACSF, an additional set of  
456 control experiments with 20 $\mu$ M carbachol and 0.05% DMSO was performed in a separate  
457 set of cells (Figure 4F; 8 cells from 4 mice), and the results were only compared between  
458 the two groups. As shown in Figure 4G, 5  $\mu$ M VU0255035 significantly reduced the  
459 depression produced by carbachol, from 0.339 (SD 0.131, N = 8 cells from 4 mice) to 0.641  
460 (SD 0.190, N=5 cells from 2 mice,  $t_{10.80}=-3.12$ ,  $p=0.019$ ). Comparing these manipulations  
461 (Figure 4H; excluding the VU0255035 experiments because they were done under different  
462 conditions), including the 0.1 Hz no-drug conditions (Figure 3B), for the period starting 5  
463 minutes after the onset of drug application through 5 minutes following application (a 15-  
464 minute period) reveals a significant effect of treatment ( $F_{5, 24}=4.59$ ,  $p=0.0044$ ). Post-tests  
465 were done to compare the effects of the drug treatments against the 0.1Hz data, and to test  
466 the effects of the antagonists against the carbachol effect. Compared to the 0.1Hz,  
467 carbachol ( $p=0.016$ ) resulted in depressed EPSPs, while depression was not significant in  
468 the presence of Oxo-M ( $p=0.11$ ). Atropine blocked the effect of carbachol alone ( $p=0.025$ ),

469 whereas neither eserine ( $p=1.0$ ) nor 75 nM pirenzepine had a discernible effect ( $p=1.0$  in  
470 each case).

471 We next tested whether the carbachol-induced transient depression of transmission  
472 was induced pre- or postsynaptically, by examining the paired pulse ratio (PPR) of EPSP  
473 slopes. Although not definitive, a change in PPR suggests a presynaptic locus of  
474 expression, whereas no change is an indicator of a postsynaptic locus (Dobrunz and  
475 Stevens 1997). Carbachol application did not change the PPR (control: 1.16 (SD 0.23);  
476 carbachol: 1.32 (SD 0.23),  $t_4=1.921$ ,  $p=0.13$ , paired t-test,  $N=5$  cells from 4 mice),  
477 suggesting that a postsynaptic mechanism underlies the reduction in EPSP size produced  
478 by carbachol. Taken together, these results suggest that exogenous activation of mAChRs  
479 causes synaptic depression at synapses onto layer 2/3 pyramidal cells, and that these  
480 effects occur through postsynaptic mechanisms. A portion, but likely not all, of this effect  
481 may be mediated by M1 receptors.

#### 482 *Modulation of intrinsic excitability*

483 Spike-timing dependent plasticity can also be affected by changes in intrinsic  
484 excitability. We therefore measured the effects of carbachol and Oxo-M alone on current-  
485 evoked firing and action potential shape. Figure 5A shows spiking of a layer 2/3 pyramidal  
486 cell in response to current injections under control conditions. Following 5 min incubation  
487 with carbachol (20 $\mu$ M), the cell fired more rapidly in response to the same currents (Figure  
488 5B). Equation 1 was fit to the the FI curves to extract the rheobase ( $I_{\text{break}}$ ), the rate of firing  
489 increase with current, and the maximal firing rate. Carbachol (20 $\mu$ M, Figure 5C) caused a  
490 reversible increase in excitability measured as an enhancement in firing rate in response to  
491 current steps ( $I_{\text{rate}}$ : control: 0.0044 (SD 0.0016) pA; carbachol: 0.0120 (SD 0.0025) pA;

492  $t_{10.62} = -4.327$ ,  $p = 0.0019$ ,  $N = 10$  cells from 5 mice, paired t-test with Welch's correction).

493 Neither the maximal firing rate  $F_2$  (control: 34 (SD 29) sp/s; carbachol: 17 (SD 5) sp/s;

494  $t_{9.49} = 2.16$ ,  $p = 0.059$ ,  $N = 10$ ), or the spike threshold  $I_{\text{break}}$  (control: 25 (SD 18) pA; carbachol:

495 32 (SD 24) pA;  $t_{16.87} = -1.407$ ,  $p = 0.19$ ,  $N = 10$ ) were altered by carbachol. The adaptation

496 ratio during carbachol was significantly decreased (control: 3.928 (SD 1.196); carbachol:

497 2.936 (SD 0.587);  $t_{13.09} = 3.278$ ,  $p = 0.0096$ ,  $N = 10$ ), and the membrane potential depolarized

498 by a small amount (control: -63.2 (SD 1.6) mV; carbachol: -62.2 (SD 1.2) mV;

499  $t_{17.03} = -2.443$ ,  $p = 0.037$ ,  $N = 10$ ). The mean first action potential half-width increased by ~0.5

500 ms, but this effect was not significant (control: 1.31 (SD 0.31) ms; carbachol: 1.89 (SD 1.13)

501 ms;  $t_{10.31} = -1.652$ ,  $p = 0.13$ ,  $N = 10$ ). The input resistance also did not change (control: 254

502 (SD 61) M $\Omega$ ; carbachol: 249 (SD 85) M $\Omega$ ;  $t_{16.28} = 0.272$ ,  $p = 0.79$ ,  $N = 10$ ).

503 We also tested how Oxo-M affected the FI curves (Figure 5D). Oxo-M decreased the

504 threshold current ( $I_{\text{break}}$ : control 110 (SD 101) pA; Oxo-M: 60 (SD 41) pA;  $t_{10.87} = 2.870$ ,

505  $p = 0.028$ ,  $N = 7$  cells from 6 mice; 2 cells were from 2 male mice; the remainder were of

506 undetermined sex). Oxo-M produced a small and non-significant effect on  $I_{\text{rate}}$  (control:

507 0.0068 (SD 0.0042) pA; Oxo-M: 0.0213 (SD 0.0184) pA;  $t_{6.64} = -1.971$ ,  $p = 0.096$ ,  $N = 7$ ). A

508 similar small but non-significant effect was evident in the maximal firing rate,  $F_2$  (control: 20

509 (SD 6) sp/s; Oxo-M: 15 (SD 5) sp/s;  $t_{9.24} = 1.908$ ,  $p = 0.105$ ,  $N = 7$ ). Interestingly, Oxo-M

510 depolarized cells by approximately 6 mV on average (control: -67.7 (SD 3.9) mV; Oxo-M: -

511 61.3 (SD 4.4) mV;  $t_{11.82} = -3.441$ ,  $p = 0.014$ ,  $N = 7$ ) and produced an increase in action



512 potential half width (control: 1.26 (SD 0.26) ms; Oxo-M: 1.59 (SD 0.27) ms;  $t_{11.93} = -3.293$ ,  
513  $p = 0.016$ ,  $N = 7$ ). No other parameters were significantly affected (all  $p > 0.09$ ). Overall, these  
514 descriptive analyses suggest that activation of muscarinic receptors increases the  
515 excitability of the cells through a combination of weak depolarization and an increased  
516 steepness of the firing rate with current.

517 To further understand how mAChR activation affects excitability, we explored the  
518 pharmacology of receptor activation on the firing of layer 2/3 pyramidal cells. Pirenzepine  
519 (75 nM; Figure 5E) appear to blunt the effects of carbachol, as there were no significant  
520 changes in RMP, adaptation ratio, first action potential half-width, or the fitted parameters of  
521 the FI curves,  $I_{break}$ ,  $F_2$ , and  $I_{rate}$  (all  $p > 0.18$ , Welch's t-test,  $N = 4$  cells from 2 mice).  $R_{in}$   
522 was lower in the presence of pirenzepine however (carbachol alone: 208 M $\Omega$  (SD 65),  
523 carbachol + pirenzepine: 160 M $\Omega$  (SD 71);  $t_{5.94} = 4.471$ ,  $p = 0.021$ ). Similarly, 10  $\mu$ M  
524 pirenzepine (Figure 5F) blocked all the effects of carbachol (all  $p > 0.23$ , Welch's t-test,  $N = 3$   
525 cells from 3 mice). Likewise, the more specific M1 receptor antagonist VU0255035 largely  
526 prevented the shifts seen with carbachol. As this drug was solubilized in 0.05% DMSO, we  
527 performed a separate set of control experiments with carbachol in the presence of DMSO  
528 for comparison. Carbachol in DMSO produced a similar increase in excitability as under  
529 control conditions (Figure 5G).  $I_{break}$  was lower (control: 90 (SD 32) pA; carbachol+DMSO:  
530 66 (SD 32) pA;  $t_{9.99} = 4.756$ ,  $p = 0.0051$ , all comparisons are paired t-tests,  $N = 6$  cells from 2  
531 mice; 1 cell was from a male mouse and the remainder were of undetermined sex), and  $I_{rate}$   
532 was higher (DMSO alone: 0.0037 (SD 0.0012) pA; carbachol+DMSO: 0.0096 (SD 0.0017)  
533 pA;  $t_{7.73} = -7.224$ ,  $p = 0.00079$ ) in carbachol, but  $F_2$  was not different (DMSO alone: 27 (SD



534 11) sp/s; carbachol+DMSO: 20 (SD 3) sp/s;  $t_{5.62}=1.905$ ,  $p=0.12$ ). As with carbachol alone  
535 and Oxo-M, the membrane potential depolarized (DMSO alone: -67.4 (SD 4.1) mV;  
536 carbachol+DMSO: -62.7 (SD 3.2) mV;  $t_{9.40}=-5.925$ ,  $p=0.0020$ ), and the adaptation ratio  
537 decreased (DMSO alone: 2.599 (SD 0.648); carbachol+DMSO: 1.989 (SD 0.561);  
538  $t_{9.80}=6.389$ ,  $p=0.0014$ ). A small but non-significant increase in the first action potential half-  
539 width was also seen (DMSO alone: 1.11 (SD 0.17) ms; carbachol+DMSO: 1.22 (SD 0.24)  
540 ms;  $t_{8.85}=-2.400$ ,  $p=0.062$ ). In the presence of 5 $\mu$ M VU0255035, the changes in firing  
541 produced by carbachol were blocked (Figure 5H). None of the FI parameters were  
542 significantly different from carbachol in DMSO control when carbachol was tested in the  
543 presence of VU0255035 ( $I_{break}$ : (carbachol-DMSO: 83 (SD 36) pA; carbachol-VU0255035:  
544 75 (SD 40) pA;  $t_{11.88}=1.561$ ,  $p=0.17$ , all comparisons are paired t-tests, N=7 cells from 3  
545 mice; 1 cell was from a male mouse and the remainder were undetermined);  $F_2$ : (carbachol-  
546 DMSO: 21 (SD 14) sp/s; carbachol-VU0255035: 18 (SD 10) sp/s;  $t_{10.50}=0.863$ ,  $p=0.42$ ),  
547  $I_{rate}$  (carbachol-DMSO: 0.0126 (SD 0.0184) pA; carbachol-VU0255035: 0.0101 (SD 0.0114)  
548 pA;  $t_{11.88}=-0.403$ ,  $p=0.70$ ). The adaption ratio also did not change (carbachol-DMSO:  
549 1.927 (SD 0.791); carbachol-VU0255035: 1.993 (SD 0.726);  $t_{11.91}=-0.579$ ,  $p=0.58$ ).  
550 However, the resting membrane potential still showed a modest depolarization (carbachol-  
551 DMSO: -64.1 (SD 4.6) mV; carbachol-VU0255035: -61.6 (SD 3.2) mV;  $t_{10.60}=-2.834$ ,  
552  $p=0.030$ , N=7 cells), and the action potential half width was significantly wider (carbachol-  
553 DMSO: 1.22 (SD 0.21) ms; carbachol-VU0255035: 1.42 (SD 0.32) ms;  $t_{10.34}=-3.034$ ,

554  $p=0.023$ ). Using MANOVA to compare all excitability measures with a carbachol challenge  
555 in the presence of VU0255035 against the carbachol challenge in DMSO however revealed  
556 no difference between the two groups ( $F_{7,5}$ ,  $p=0.083$ ). Individual post-hoc comparisons only  
557 showed a significant difference in the adaptation ratio ( $F_{1,11}=14.48$ ,  $p=0.0029$ ). Taken  
558 together these data suggest that activating the muscarinic receptors with either carbachol or  
559 Oxo-M increases overall excitability of the cells and in increases the steepness of the FI  
560 curve. Blocking the mAChRs seems to partially prevent these changes, but the effects are  
561 modest and not consistent between 10  $\mu$ M pirenzepine and VU0255035, suggesting that  
562 the two compounds likely have different profiles with respect to antagonism of carbachol at  
563 different receptor subtypes that are differentially coupled to the ion channels regulating  
564 excitability.

#### 565 *mAChR activation regulates tLTP*

566 We next tested the hypothesis that cholinergic neuromodulation by mAChRs can  
567 change STDP timing rules by modulating the strength of tLTP. We focused on the +10 ms  
568 pre-before-post intervals because the largest changes in EPSPs were seen with this timing,  
569 and we were more confident that the effects of any manipulations would not be caused by  
570 rundown of synaptic transmission. Activating mAChRs with carbachol reduced tLTP at  
571 +10ms, (Figure 6A; control: 1.457 (SD 0.391), N = 9 cells from 9 mice; same control group  
572 as above, carbachol: 0.924 (SD 0.440), N=6 cells from 6 mice,  $t_{14,60}=2.40$ ,  $p=0.037$ ,  
573 Welch's t-test for unpaired samples). The second set of experiments with weaker test  
574 EPSPs showed a similar suppression of the tLTP, but was not significant (mean  $S/S_0=1.716$   
575 (SD 0.936), N = 6 cells from 2 mice, compared 1.309 (SD 0.384), N=8 cells from 5 mice,  
576  $t_{6,24}=-1.001$ ,  $p=0.352$ , Welch's t-test for unpaired samples). Combined, these two sets of

577 experiments showed an potential effect of carbachol (control:  $S/S_0 = 1.561$  (SD 0.646),  $N =$   
578 15 cells from 11 mice; in carbachol:  $S/S_0 = 1.144$  (SD 0.430,  $N = 14$  cells from 11 mice),  
579  $t_{25.11} = 2.05$ ,  $p = 0.052$ ). To more specifically activate mAChRs, we also tested Oxo-M.  
580 Application of Oxo-M ( $3 \mu\text{M}$ ) during induction clearly prevented tLTP (Figure 6B, mean  
581  $S/S_0 = 0.917$  (SD 0.445),  $N = 7$  cells from 4 mice,  $t_{15.07} = 2.54$ ,  $p = 0.026$ , compared to control  
582  $+10\text{ms}$ ). To explore whether intrinsic cortical acetylcholine could modulate STDP in auditory  
583 cortical neurons, we also examined the effects of the anticholinesterase, eserine.  
584 Application of eserine during pre-before-post pairing also prevented tLTP induction (Figure  
585 6C, mean  $S/S_0 = 1.005$  (SD 0.283),  $N = 6$  cells from 3 mice,  $t_{15.77} = 2.59$ ,  $p = 0.022$ ) compared  
586 to control at  $+10\text{ms}$ ), indicating that endogenous acetylcholine can prevent tLTP at  
587 excitatory synapses onto layer 2/3 pyramidal neurons. As the postsynaptic action potentials  
588 were elicited by trains of brief current pulses (and therefore controlled), the effects of  
589 mAChRs on the firing rate and cell excitability (Figure 5) were not responsible for these  
590 differences, although increases in action potential width could contribute to changes in  
591 STDP. Taken together these experiments indicate that tLTP can be modulated by activation  
592 of mAChRs through carbachol, Oxo-M or endogenous ACh.

593 In the dorsal cochlear nucleus, muscarinic receptor activation with Oxo-M converted  
594 postsynaptic tLTP to presynaptic tLTD by acting on M1/M3 receptors (Zhao and  
595 Tzounopoulos 2011). Because M1 receptors appear to at least partially contribute to the  
596 synaptic depression produced by carbachol (Figure 4) and the excitability of cells (Figure 5),  
597 it is possible that they can also influence other signaling pathways necessary for the  
598 induction of tLTP. We therefore tested the hypothesis that the cholinergic effects on tLTP  
599 induction in auditory cortex depended on the activation of M1 and/or M3 receptors. The

600 suppression of tLTP at +10 ms by carbachol was not significantly affected by the  
601 simultaneous presence of the M1 antagonist, pirenzepine (10 $\mu$ M, a high concentration that  
602 also should also block M4 receptors), together with the M3 antagonist, 4-DAMP (1 $\mu$ M)  
603 (Figure 6D, mean with carbachol and antagonists: 0.951 (SD 0.197), N=6 cells from 4 mice,  
604  $t_{6.93}=-0.138$ ,  $p=0.89$ , compared to carbachol alone in Figure 6A). Likewise, comparing tLTP  
605 in 20 $\mu$ M carbachol (including a subset of cells tested with carbachol in 0.05%DMSO, which  
606 were not different than carbachol alone) against tLTP in the same solution with VU0255035  
607 showed that block of the M1 receptors did not restore tLTP (Figure 6E, carbachol +DMSO  
608 group: 1.309 (SD 0.384), N = 8 cells from 5 mice, carbachol+DMSO+VU0255035: 1.224  
609 (SD 0.573), N=5 cells from 3 mice,  $t_{10.65}=0.293$ ,  $p=0.78$ ). tLTP was partially restored by 10  
610  $\mu$ M pirenzepine and 1  $\mu$ M 4-DAMP during the application of Oxo-M (the average time  
611 course of EPSP slopes after pairing is very similar to that in the absence of any drugs), but  
612 the results were quite variable and the net effect was not significant compared to OxoM's  
613 reduction of tLTP at +10ms (Figure 6F, tLTP in presence of pirenzepine and 4-DAMP: 1.295  
614 (SD 0.820), N=7 cells from 5 mice,  $t_{9.25}=-1.07$ ,  $p=0.31$ ). Thus, although activation of  
615 mAChRs suppresses tLTP (Figure 6A-C), it appears that this effect is not the result of M1  
616 receptor activation, and M3 and M4 receptors likewise are not required.

617 Finally, we tested whether the tLTP depended on intracellular calcium changes. When  
618 exogenous calcium chelators such as BAPTA are present in the intracellular solution,  
619 incoming calcium ions are rapidly buffered and free calcium concentration changes are  
620 strongly reduced (Tsien 1980). In the presence of intracellular BAPTA (10 mM), pre-before-  
621 post pairing at +10 ms failed to induce tLTP, and instead led to a clear LTD (Figure 6G,  
622 0.581 (SD 0.222), N=5 cells from 3 mice,  $t_{14.95}=5.34$ ,  $p=0.00018$ , compared to +10 ms

623 control). Thus, an increase in postsynaptic calcium during STDP induction appears  
624 necessary for the induction of tLTP.

625 We also performed additional exploratory experiments testing the effects of carbachol  
626 during EPSP-spike pairing at +50 ms and -10 ms. On average post-before-pre tLTD (-10  
627 ms) was not significantly affected by carbachol (Figure 7A; mean 1.091 (SD 0.589), N=7  
628 cells from 6 mice,  $t_{4.23}=-1.51$ ,  $p=0.178$ ). Eserine (1  $\mu$ M) also did not have an effect on tLTD  
629 induction at -10 ms (Figure 7B; 0.793 (SD 0.279),  $t_{4.73}=-0.334$ ,  $p=0.75$ , N=5 cells from 3  
630 mice). Internal BAPTA likewise had no effect on the tLTD at -10 ms (Figure 7C, 0.665 (SD  
631 0.196), N=4 cells from 3 mice,  $t_{5.16}=0.81$ ,  $p=0.466$ ). Finally, pre-before-post tLTD at +50 ms  
632 was not significantly affected by carbachol (Figure 7D). Although the mean value changed  
633 from LTD (0.605) to LTP (1.225), there was a large variance between cells (SD 1.259), N=7  
634 cells from 6 mice,  $t_{4.34}=-1.28$ ,  $p=0.245$ ). In combination with the effects seen above at the  
635 +10 ms interval, these exploratory experiments suggest that mAChRs may modulate  
636 tLTP/tLTD differently depending on the timing intervals.

637 *Activation of mAChRs reduces NMDA current.*

638 One mechanism that could account for the reduction in tLTP with mAChR (Figure 6A-C)  
639 activation is that the synaptically-evoked calcium influx through NMDA receptors is  
640 decreased and therefore does not reach the threshold required to induce tLTP. To test  
641 whether mAChR activation blocked tLTP by directly or indirectly acting on NMDA receptors,  
642 we recorded pharmacologically isolated NMDA receptor mediated EPSCs in voltage clamp  
643 with and without mAChR activation (Figure 8A). We found a reduction in the evoked NMDA  
644 receptor currents in the presence of 20 $\mu$ M carbachol (Figure 8B control: 263 pA (SD 123),

645 carbachol: 148 pA (SD 104.0),  $t_{12}=4.460$ ,  $p=0.0008$ ,  $N=13$  cells from 6 mice, paired t-test).  
646 The current was partially restored after the carbachol was removed from the perfusate by  
647 replacement with normal ACSF. The current was mediated by NMDA receptors because it  
648 was nearly completely blocked following the application of the NMDA receptor antagonist D-  
649 aminophosphonovaleric acid (D-APV, 50  $\mu$ M, remaining current 15.8 (SD 13.9) %,  $N=3$ ;  
650 data not shown). In a subset of cells, the EPSC paired-pulse ratio was also measured to  
651 test for a potential presynaptic effect of carbachol. The paired-pulse ratio of the isolated  
652 NMDA current was not altered by carbachol application (Figure 8C, control: 0.95 (SD 0.24),  
653 carbachol: 0.94 (SD 0.23),  $t_6=0.3135$ ,  $p=0.76$ ,  $N=7$  cells from 3 mice, paired t-test)  
654 consistent with the lack of effect of carbachol on the paired-pulse ratios of EPSPs described  
655 above. Although we cannot exclude that carbachol acts presynaptically on the basis of this  
656 experiment, these results suggest that a decrease in postsynaptic current through NMDA  
657 receptors following mAChR activation could be at least partially responsible for the  
658 decrease in tLTP.

### 659 *Dendritic Calcium Signaling Is Reduced by mAChR activation*

660 Postsynaptic calcium transients provide an associative link between synapse activation,  
661 postsynaptic cell firing, and synaptic plasticity (Koester and Sakmann 1998; Malenka et al.  
662 1988). By definition, back propagating action potentials are essential for the induction of  
663 STDP. Because carbachol reduced the current through NMDA receptors, it is possible that  
664 it also could reduce subsequent calcium influx in dendrites of AC pyramidal cells. To  
665 investigate this, we examined postsynaptic calcium transients in the apical dendritic shafts  
666 and synapses of layer 2/3 pyramidal neurons during timed pre- and postsynaptic (action  
667 potential) activity. Figure 9A, B show the recording and stimulating configuration.

668 Presynaptic stimulation was provided by an extracellular pipette located 50–100  $\mu\text{m}$  from  
669 the soma along an apical dendrite. A series of regions along the dendrite and soma were  
670 identified to measure the calcium signals (Figure 9B) in response to a set of interleaved  
671 stimulus conditions (Figure 9C). Two sets of experiments were performed. In one set of  
672 experiments, pyramidal neurons were filled through the recording patch pipette with a  
673 structural indicator, AlexaFluor 568, and the calcium indicator Fluo-5F. The AlexaFluor 568  
674 image was visualized and used to select a region on the apical dendrite for placement of the  
675 extracellular stimulating electrode. A burst of postsynaptic action potentials (APs) was  
676 preceded by extracellular stimulation by 10 ms, as was used for the induction of STDP.  
677 Calcium signals were analyzed in regions of interest (ROIs) placed over the primary apical  
678 dendrites and the first secondary branches. Somatically-evoked action potentials induced  
679 calcium changes throughout the visible regions of the dendritic tree. A single ROI was  
680 selected for analysis in each cell. This ROI was initially chosen as the region closest to  
681 extracellular stimulation ( $\sim 10\text{--}20\ \mu\text{m}$  from electrode). All ROI's were then tested to identify  
682 where the calcium signal in the dendritic tree was larger when EPSPs were paired with APs  
683 at the 50 ms interval than for APs alone, using a ratio measurement, with the requirement  
684 that the peak calcium signal for the AP alone be larger than 2SD of the baseline  
685 fluorescence signal prior to stimulation. In 5 of the 21 cells, this ROI was the one closest to  
686 the stimulating electrode. However, in the remainder of the cells, this ROI was elsewhere on  
687 the dendritic tree (an adjacent ROI in 7 cells, and more distant in the remainder), consistent  
688 with activation of fibers that might run vertically with layer 2/3 before contacting the target  
689 cell. All subsequent comparisons used these selected ROIs. Note that although the ROI  
690 was selected on the basis of the difference with +50 ms EPSP-AP intervals (Figure 10, A1-  
691 A3), comparisons at +10 ms and with the AP-alone condition using that ROI were based on



692 different traces in the same cell. Although the +50 ms interval data are shown, they are not  
693 used further to avoid circularity in the analysis.

694 We observed an increase in calcium with EPSPs and APs compared to APs alone in  
695 Fluo5F (Figure 10, B1-B3; linear mixed effects model with the integrated calcium signal and  
696 AP configuration, maximum-likelihood AIC=15.3, log likelihood=-1.63; post-tests comparing  
697 AP alone to AP+10ms EPSP:  $p=0.0016$ ; AP+EPSP at +50ms:  $p=0.0047$ ; N=14 cells from 7  
698 mice; post-tests are simultaneous tests for general linear hypotheses with multiple  
699 comparisons of means using Tukey contrasts). There was no difference between the  
700 different EPSP timings (AP+EPSP at +10ms vs. AP+EPSP at +50ms:  $p=0.95$ ). In response  
701 to synaptic stimulation that produced EPSPs at the soma of 2-10 mV, we were unable to  
702 resolve any changes in indicator fluorescence (Figure 10 C1-C3). A similar result was seen  
703 with ACR as the calcium indicator in a separate set of experiments (Figure 10, H-J). With  
704 ACR, cells showed an increase in the calcium signal when APs were paired with the EPSPs  
705 (AIC=21.8; log likelihood=-4.89; post-tests AP vs AP+EPSP at +50ms;  $p=0.0065$ , Figure  
706 10, H1-H3; AP vs AP+EPSP at +10ms,  $p=0.0017$ , Figure 10 11-I3; N=7 cells from 4 mice),  
707 but no differences with EPSP timing (AP+EPSP at +10ms vs. AP+EPSP at +50ms,  $p=0.92$ ).  
708 Again, there was no visible fluorescence transient with EPSPs alone (Figure 10, J1-J3).

709 Next, after 5 minutes of baseline measurements, carbachol (20  $\mu$ M) was bath applied  
710 for 5 min. Carbachol did not induce changes in the resting indicator fluorescence. However,  
711 APs induced a much larger calcium influx in the presence of carbachol, when measured  
712 with either Fluo5F (Figure 10, D1-D3, control: 0.46 (SD 0.48, range=0.03-1.58), carbachol:  
713 0.67 (SD 0.71, range=0.08-2.33),  $t_{13}=-2.74$ ,  $p=0.033$ , N=14, paired t-test) or with ACR  
714 (Figure 10, K1-K3, control: 1.47 (SD 0.72, range=0.09-2.27); carbachol: 2.38 (SD 0.74,



715 range=1.39-3.28),  $t_6=-5.17$ ,  $p=0.002$ ,  $N=7$ ). The increase in AP-mediated calcium influx  
716 was blocked by atropine, implicating mAChRs (data not shown). No calcium signal was  
717 detected with EPSPs alone in the presence of carbachol with either indicator (Figure 10E1-  
718 E3 and L1-L3). Pairing EPSPs and APs produced a larger calcium influx in carbachol than  
719 without carbachol (Fluo5F: AIC=16.0, log likelihood=-2.01). In individual comparisons, the  
720 effect of EPSP+AP pairing in the presence of carbachol, compared to APs alone, was  
721 significant at the +50 ms interval (Figure 10, F1-F3,  $p=0.040$ ), but not at the +10 ms interval  
722 (Figure 10, G1-G3,  $p=0.11$ ) in Fluo5F. Furthermore, the calcium influx with AP+EPSP  
723 pairing was not significantly different from the AP-alone condition in carbachol when  
724 measured with ACR (Figure 10, M1-M3,  $p=0.41$  at +50 ms; Figure 10, N1-N3,  $p=0.79$  at +10  
725 ms).

726 A linear mixed model was constructed to examine the effects of carbachol on the  
727 enhancement of the calcium signal from APs alone by EPSPs at the +10 ms interval, with a  
728 fixed effect of drug presence, and by-cell random slopes for the effects of carbachol (ROI's  
729 for analysis of the +10 ms interval were selected using the +50 ms interval data and thus  
730 the +50 ms data were not analyzed). The two indicator dyes were treated in separate  
731 analyses. For Fluo-5F, this revealed a significant effect of carbachol, which reduced the  
732 facilitation of the calcium signal by EPSPs ( $F_{(1, 14)} = 9.66$ ,  $p=0.0077$ ). A similar result was  
733 observed when using ACR as the indicator ( $F_{(1,14)} = 5.39$ ,  $p = 0.036$ ). Taken together,  
734 these experiments indicate that, in the absence of carbachol, there is a synergistic  
735 interaction between APs and EPSPs at the 10 ms interval that results in increased dendritic  
736 calcium compared to APs alone (Figure 10, B3, I3), but this effect appears to be  
737 significantly reduced in the presence of carbachol (Figure 10, G3, N3).

738

739 **Discussion**

740 We found that synapses activated by electrical stimulation in layer 2/3 onto layer 2/3  
741 cells in mouse AC exhibit STDP. Although tLTP and tLTD were observed in the expected  
742 short positive (+10 ms) and negative (-10 ms) intervals, respectively, an additional tLTD was  
743 apparent at longer positive (+50 ms) intervals. We also found that mAChRs modulate tLTP  
744 and tLTD in a manner that is dependent on the EPSP-spike timing. Pharmacological  
745 activation of mAChRs when using +10 ms pairing intervals prevented tLTP induction, and  
746 could reduce tLTD at -10 and +50 ms pairing intervals, potentially leading to tLTP. tLTP at  
747 +10 ms intervals appeared to depend on intracellular calcium signaling. mAChR also  
748 activation reduced the NMDA receptor current at excitatory synapses onto layer 2/3 cells.  
749 Pairing APs and EPSPs resulted in increased dendritic calcium even when no calcium  
750 signal could be detected with EPSPs alone. This apparent supralinear calcium signal  
751 generated by pairing at +10 ms intervals was significantly decreased with mAChR  
752 activation.

753 *Synaptic STDP rules in AC*

754 The magnitude and temporal structure of STDP varies with brain area, cell and synapse  
755 type (Abbott and Nelson 2000; Larsen et al. 2010). In rat AC slices, tLTP was previously  
756 observed at +10 ms intervals and tLTD at -40 ms at layer 2/3 to layer 2/3 synapses  
757 (Karmarkar et al. 2002). However, the STDP window was not further examined in that  
758 study. Other primary sensory cortical areas (V1 and S1) also exhibit before-post tLTP and  
759 post-before-pre tLTD at 10 ms intervals at layer 2/3 to layer 2/3 synapses (Froemke et al.  
760 2006; Nevian and Sakmann 2006; Zilberter et al. 2009). A similar timing rule has been

761 shown for synapses onto layer 5 cells in AC (D'amour and Froemke 2015). In vivo,  
762 "stimulus-timing" plasticity has also been reported in AC, by repetitively pairing acoustic  
763 stimuli (Dahmen et al. 2008) or pairing stimulation of the spinal trigeminal nucleus with  
764 acoustic stimuli (Basura et al. 2015). Within the timing range that has been examined in  
765 vivo, -30 to +30 ms, these paradigms result in tLTP and tLTD that is similar to what we  
766 report here.

767 In most cortical areas, the magnitude of tLTP falls off approximately exponentially with  
768 the difference between pre- and postsynaptic spike times. However, we also observed a  
769 pre-before-post tLTD at +50 ms, and on average, no tLTP or tLTD at +20 ms intervals,  
770 suggesting that the STDP curve is triphasic. Computational models have predicted triphasic  
771 STDP curves that exhibit tLTD at longer positive pre-before-post intervals (Karmarkar et al.  
772 2002; Shouval and Kalantzis 2005). This prediction is based on three observations: calcium  
773 influx through NMDARs is a necessary and sufficient signal to induce bidirectional plasticity  
774 (Lisman et al. 1998), the sign and magnitude of synaptic plasticity is determined by the  
775 calcium concentration in postsynaptic spines (Cormier et al. 2001; Yang et al. 1999), and  
776 peak calcium level varies with the time interval between pre- and postsynaptic spiking  
777 (Graupner 2010; Karmarkar et al. 2002). These theoretical predictions of pre-before-post  
778 tLTD are consistent with experimental evidence in hippocampal slices (Nishiyama et al.  
779 2000; Wittenberg and Wang 2006).

780 The tLTD at -10 ms and +50 ms flanking the tLTP window at +10 ms and could serve to  
781 help sharpen the potentiation of nearly coactive synaptic inputs across the tonotopic map  
782 that are generated by the spatio-temporal structure of acoustic stimuli. Frequency and  
783 amplitude modulation are common features of natural sounds (Lewicki 2002; Woolley et al.  
784 2005), including species specific vocalizations, and could produce repeated temporal

785 patterns of neural activity in subsets of synapses that could engage STDP as a way of  
786 creating either a sensory memory or creating a template within the local circuit based on  
787 synaptic strengths for the further analysis of time-varying sounds. The temporally flanking  
788 tLTD windows could help to suppress non-coincident synaptic inputs. This idea is consistent  
789 with the proposal that recurrent connections can contribute an underlying depolarization that  
790 can help to amplify selected afferent signals, and with modeling studies proposing that local  
791 amplification could be important in enhancing the sensory selectivity of cortical neurons  
792 (Douglas et al. 1995; Krause et al. 2014; Reinhold et al. 2015; Sompolinsky and Shapley  
793 1997).

#### 794 *Muscarinic modulation of synaptic transmission in AC*

795 Acetylcholine plays an important role in many aspects of cortical development  
796 (Hohmann and Berger-Sweeney 1998; Robertson 1998), and some effects of ACh are  
797 mediated through activation of mAChRs. Normal cholinergic receptor function appears to be  
798 required to help establish the normal tonotopic organization and response features of the  
799 auditory cortex. Mice lacking muscarinic M1 receptors more frequently display multi-peak  
800 frequency tuning curves as compared to more sharply tuned neurons in wild-type A1. The  
801 abnormal tuning curves are also associated with a disorganized tonotopic map (Zhang et al.  
802 2005). Pairing electrical stimulation of nucleus basalis with tones produces large shifts in  
803 frequency tuning of A1 neurons (Weinberger 1998) and a corresponding reorganization of  
804 the tonotopic map that results in an over-representation of the paired tone frequency  
805 (Froemke et al. 2007; Kilgard 1998; Weinberger 1998). However, in M1 receptor knockout  
806 mice, pairing nucleus basalis stimulation and tones produces much smaller shifts in  
807 frequency tuning in A1 (Zhang et al. 2006). It is not clear, however, to what extent these  
808 changes are primarily due to remapping at the level of the thalamocortical recipient cells in

809 layer 4 (whether by thalamic input or by biasing through intracortical circuits), or whether  
810 they also reflect changes ascending connections to layer 2/3 or in the layer 2/3 circuitry  
811 itself. Tonotopy in A1 is most often measured in anesthetized animals, where the responses  
812 are dominated by the more precise tonotopy of layer 4 rather than the imprecise map in  
813 layer 2/3 (Kanold et al. 2014; Winkowski and Kanold 2013) (but see (Tischbirek et al.  
814 2019)). Therefore, the specific role of cholinergic systems and M1 receptors in the plasticity  
815 of tonotopy or response areas in layer 2/3 cells is not clear.

816 At the cellular level, acetylcholine acting on mAChRs in cortex can affect intrinsic  
817 excitability, synaptic potentials, neurotransmitter release and calcium influx (Cho et al. 2008;  
818 Froemke et al. 2007; Metherate and Ashe 1995; Salgado et al. 2007). Consistent with  
819 findings in auditory and visual cortices (McCoy and McMahon 2007; Metherate and Ashe  
820 1995) we found that the cholinergic agonists carbachol and Oxo-M depress glutamatergic  
821 synaptic transmission. Endogenous activation of mAChRs with an anticholinesterase also  
822 produced a weak depression of synaptic potentials suggesting that ambient acetylcholine  
823 may tonically regulate synaptic transmission in AC. The synaptic depression generated by  
824 carbachol was blocked by atropine, implicating mAChRs rather than nAChRs. The  
825 depression of transmission by carbachol was not blocked by 75 nM pirenzepine, which at  
826 this concentration is predominantly an M1 receptor antagonist, consistent with results in  
827 prefrontal cortex (Vidal and Changeux 1993). In addition, the depression was only weakly  
828 antagonized by the M1-selective antagonist VU0255035 (Sheffler et al. 2009) consistent  
829 with the suggestion that M1 receptors are not essential in generating the pharmacologically  
830 induced synaptic depression.

831 The muscarinic receptor subtypes M2 and M3 are also expressed in auditory cortex  
832 (Salgado et al. 2007). The M2 receptors are localized to excitatory terminals from white

833 matter inputs as well as layer 2/3 GABAergic axon terminals, and presynaptically modulate  
834 neurotransmitter release. At the network level, activation of cholinergic synapses may alter  
835 the coordinated activity of excitatory and inhibitory neurons by selectively modulating the  
836 excitability or synaptic transmission in subtypes of inhibitory cells (Kuchibhotla et al. 2017;  
837 Letzkus et al. 2011; Sugihara et al. 2016). On the other hand, our results appear to reveal  
838 an effect of mAChR activation with carbachol that is mediated postsynaptically at excitatory  
839 synapses onto the pyramidal cells, based on the unchanged paired-pulse ratio of the  
840 synaptic responses for both weak EPSPs and for pharmacologically-isolated NMDA  
841 receptor currents. Consistent with a postsynaptic site of action, we also found that  
842 carbachol increased intrinsic excitability by reducing spike rate adaptation, and enhanced  
843 back propagating action potential-mediated calcium influx, likely through reduction in the  
844 availability of dendritic potassium conductance. The increase in excitability and dendritic  
845 calcium influx are consistent with other studies in auditory and visual cortices (Cho et al.  
846 2008; Metherate and Ashe 1995).

847 Taken together, these results indicate that activation of mAChRs would increase  
848 postsynaptic pyramidal cell excitability while simultaneously decreasing excitatory  
849 intracortical transmission. If the effects of mAChRs are selective for intracortical layer 2/3  
850 connections relative to other synaptic inputs, then cholinergic systems could enhance the  
851 salience of ascending sensory information arising through thalamocortical afferents (Hsieh  
852 et al. 2000) and interlaminar synaptic input from layer 4. A suppression of recurrent  
853 excitatory connections with L2/3 by mAChR activation, together with modulation of the  
854 inhibitory circuits (Kuchibhotla et al. 2017), might also be expected to alter the frequency  
855 sensitivity of superficial AC neurons, by reducing the lateral spread of recurrent excitation.

856 *mAChR modulation of STDP*

857       There is clear evidence that neuromodulators, including acetylcholine control STDP  
858 rules by regulating polarity, magnitude and temporal requirements for plasticity. For  
859 example, mAChR activation during pre-before-post pairings has been reported to induce  
860 tLTP (Wespatat et al. 2004) and gate tLTD (Seol et al. 2007) in V1. Synaptically-released  
861 ACh can enhance tLTP while blocking tLTD in hippocampus (Sugisaki et al. 2011).  $\beta$ -  
862 adrenergic receptor activation controls the gating of tLTP in V1 (Seol et al. 2007) and can  
863 affect the overall temporal structure of tLTP/tLTD (Salgado et al. 2011). Nicotinic receptor  
864 activation prevents tLTP induction in prefrontal cortex (Couey et al. 2007). Dopaminergic  
865 activation extends the tLTP window and converts tLTD to tLTP in hippocampus (Zhang et  
866 al. 2009). Our results show that mAChR activation with specific agonists or with the  
867 anticholinesterase eserine (which may also result in activation of nicotinic receptors) during  
868 pre-before-post pairings prevents tLTP induction in AC. The mAChR-mediated suppression  
869 of tLTP in AC is consistent with the finding that increasing acetylcholine levels with eserine  
870 in CA1, during activation of the cholinergic medial septal inputs can prevent tLTP induction  
871 (Sugisaki et al. 2011). The relative timing of glutamatergic versus cholinergic synaptic  
872 transmission plays also plays role in the mechanisms and net effects on plasticity (Gu and  
873 Yakel 2011). It is not clear how the effects of slow, long-term activation (and potential  
874 desensitization) of the receptors, as employed in the experiments here, are related to the  
875 effects of the temporally and spatially restricted patterns of cholinergic activity expected in  
876 vivo.

877       The most parsimonious hypothesis to explain the reduction of tLTP in our experiments  
878 is that activation of the mAChR's reduced synaptic transmission during the induction  
879 protocol, which in turn resulted in a lower calcium influx that was not sufficient to



880 consistently support tLTP. Three observations support this idea. First, we observed that  
881 mAChR activation reduced NMDA current at layer 2/3 synapses, consistent with  
882 observations in juvenile rat AC slices (Flores-Hernandez et al. 2009). A molecular  
883 mechanism for mAChR-dependent internalization of NMDA receptors has been described  
884 in the hippocampus (Jo et al. 2010) that could explain this reduction. Second, tLTP (but not  
885 tLTD) was blocked by chelating intracellular calcium with BAPTA, which suggests an  
886 obligate role for calcium. This calcium can arise three sources, transmembrane calcium  
887 influx through calcium channels opened by depolarization provided by back propagating  
888 action potentials, calcium influx through synaptically-activated NMDARs, and calcium-  
889 induced calcium release from intracellular stores. Each of these sources likely has different  
890 targets because of the spatially-restricted actions of calcium. The increase in calcium influx  
891 that we observed in the dendritic shaft during brief trains of action potentials and the  
892 increase in the amplitude of that influx during mAChR activation are consistent with similar  
893 findings in V1 (Cho et al. 2008). However, it is not clear that these effects directly play a role  
894 in regulating tLTP. We did not detect bulk calcium transients in the dendrites associated  
895 with our weak (2-8 mV) EPSPs. When EPSPs were paired with an action potential burst,  
896 the dendritic calcium transients were larger than with action potentials alone, suggesting an  
897 amplification of calcium influx through NMDAR receptors (Kumar et al. 2018; Schiller et al.  
898 1998) by a transient voltage-dependent removal of the Mg<sup>2+</sup> block of NMDARs (Nowak et  
899 al. 1984). Interestingly, in the presence of carbachol, the dendritic shaft calcium influx  
900 during pairing of EPSPs and action potentials did not show enhancement over action  
901 potentials alone, consistent with the suppression of NMDA receptor currents by mAChRs  
902 (Figure 8). As the activated NMDARs are most likely limited to single dendritic spines and  
903 the adjoining dendritic shaft (Müller and Connor 1991) or could expand into more of the  
904 shaft area (Eilers et al. 1995) our limited ability to detect small changes in the spines may

905 mean that we missed some key changes in the calcium signal. In addition, if under normal  
906 conditions the detected calcium was near the upper end of the non-linear binding  
907 relationship between free calcium and the indicator fluorescence, a further increase in  
908 calcium may have been masked, so the fluorescence signal did not accurately reflect the  
909 intracellular calcium. Although we used two indicators with different reported  $k_d$  values for  
910 these measurements in an attempt to minimize possible effects of binding saturation, the  
911 affinity of these indicators for calcium in the cellular environment is not known. These  
912 measurements should be revisited with more sensitive and spatially precise methods.  
913 Taken together, these results are consistent with the idea that mAChR activation may have  
914 reduced the increase in postsynaptic calcium to a level below that required for tLTP  
915 induction, most likely as a result of the mAChR-induced reduction in NMDA current.

#### 916 *Summary*

917 From a functional viewpoint, the depression of tLTP during activation of mAChRs at  
918 layer 2/3 synapses suggests that synaptic learning rules can be modified during behavioral  
919 states that affect cortical cholinergic tone during the active performance of an auditory task  
920 (Kuchibhotla et al. 2017). The reduction of tLTP at the +10 ms interval suggests that a non-  
921 modifiable weight may be useful in environmental situations where the attributes of sounds  
922 are being identified and tracked, and where synapse-dependent changes and plasticity in  
923 sensory processing provided by a normally dynamically changing layer 2/3 circuit in the  
924 early parts of the cortical processing pathway would be detrimental to the consistent  
925 recognition or discrimination of such sounds. However, these are only one of many distinct  
926 synaptic circuits in a complex cortical network, and other synaptic connections may respond  
927 to changes in cholinergic tone quite differently.

928

929 **Conflict of Interest:**

930 The authors have no competing financial interests to declare.

931

932 **Author Contributions**

933 D.R. and P.B.M. designed research. D.R. and M.B.K. performed electrophysiological  
934 experiments. D.R., M.B.K., and P.B.M. analyzed data and wrote the manuscript.

935

936 **Acknowledgements**

937 We thank Dr. Luke Campagnola for his acquisition software, and H. O'Donohue for  
938 experimental suggestions on pharmacology and organizational support. This work was  
939 supported by US National Institute on Deafness and other Communication Disorders grants  
940 R01DC0009809 and R01DC000425 to PBM.

941

942

943 **Figure Legends**

944

945 Figure 1: Arrangement of stimulating and recording electrodes in layer 2/3 of auditory  
946 cortex.

947 A. Low-magnification view of a thalamocortical slice showing the location of the stimulating  
948 electrode (*s*) and the recording electrode (*r*) during an experiment. The boundaries of the  
949 cortical area examined in this study are indicated by the dashed white lines. An indentation  
950 associated with the net holding the slice in the chamber is also indicated (*net*). B. Current-  
951 clamp recordings in response to current pulses from a layer 2/3 pyramidal cell, showing the  
952 regular firing with adaptation typical of the recorded cells in this study. Top: Voltage traces.  
953 Bottom: Injected current steps.

954

955 Figure 2: Changes in the strength of layer 2/3 auditory cortical synapses onto pyramidal  
956 cells induced by repetitive pairing of EPSPs with postsynaptic spike bursts.

957 For each pairing interval, the left column summarizes the time course of the maximum  
958 EPSP onset slope relative to the baseline slope ( $S/S_0$ ). The right column shows example  
959 EPSPs before and after pairing. A.  $-20$  ms (post $\rightarrow$ pre) leads to weak tLTD (average control  
960 EPSP is shown in black, and the averaged post-pairing EPSP is shown in red). The inset in  
961 A shows the pairing paradigm for negative intervals (panels A-D), where the EPSP is  
962 elicited by presynaptic fiber stimulation, and the postsynaptic cell is forced to spike with a  
963 train of 5 current pulses at 8 ms intervals. The pairing occurs at the time indicated by *S* and  
964 the arrow in the graph in this and subsequent figures. The time indicated by the short

965 horizontal line in the inset represents the measurement of the pairing interval.  $N$  indicates  
966 the number of cells. B. Comparison of averaged EPSPs during the baseline (black trace)  
967 and over 25-40 minutes after pairing (red trace). The same conventions are used in the  
968 remaining panels. C, D.  $-10$  ms post $\rightarrow$ pre pairing results in tLTD. E, F. Summary of  
969 pre $\rightarrow$ post pairing at  $+10$  ms, with EPSPs preceding the postsynaptic spikes, results in tLTP.  
970 G, H. Same paradigm as E, with pre $\rightarrow$ post pairing at  $+20$  ms showing no change on  
971 average. I, J. Summary for pre $\rightarrow$ post pairing at  $+50$  ms, resulting in tLTD. The inset in I  
972 illustrates the pairing paradigm used in panels E-J. The time indicated by the horizontal line  
973 in the inset corresponds to the pairing interval. The time course of EPSP slope for individual  
974 cells is shown by the faint gray lines. Error bars are SDs.

975

976 Figure 3: Summary of changes in synaptic strength across pairing intervals and for control  
977 conditions.

978 A. Summary of EPSP slopes across pairing intervals, and a low-frequency pairing control  
979 ( $0.1$  Hz). Each point is an individual cell; boxes show median and interquartile distances;  
980 whiskers show 5 and 95% confidence intervals. Black circles are data from the first set of  
981 experiments; gray circles are from a second independent set of experiments at the  $+10$  ms  
982 interval (see text). The single asterisks indicate significant depression at  $-10$  and  $+50$  ms ( $p$   
983  $< 0.05$ ) when compared to the  $+10$  ms interval; double asterisks indicate significant  
984 ( $p < 0.005$ ; combined datasets) tLTP at the  $+10$  ms interval (1-way ANOVA, followed by  
985 Tukey's test for all pairwise combinations of intervals). B. EPSP slopes showed a slight  
986 depression with either no postsynaptic action potentials during the pairing period ("Pre" only  
987 condition), or only action potentials and no EPSPs during the pairing period ("Post" only  
988 condition).

989

990 Figure 4: Muscarinic receptor activation depresses synaptic transmission at layer 2/3

991 synapses onto auditory cortical pyramidal cells.

992 A. The cholinergic agonist carbachol (20  $\mu$ M, 5 mins) elicits a transient depression during

993 agonist application followed by a weak but continuing LTD after washout that lasts the

994 duration of the recording. B. The carbachol-induced transient depression is prevented by 10

995  $\mu$ M atropine, a nonselective mAChR antagonist. C. Carbachol-induced depression is not

996 inhibited by 75 nM pirenzepine. D. The muscarinic receptor-specific agonist,

997 Oxotremorine-M, produces a transient depression, similar to that produced by carbachol.

998 E. Application of the anticholinesterase eserine (1  $\mu$ M, 5mins) induces a weak reversible

999 transient depression. F. Depression of transmission with 20  $\mu$ M carbachol is not affected by

1000 0.05% DMSO. Data are from a separate set of cells than those shown in panel A. G. The

1001 M1 receptor-specific antagonist VU0255035 blunts the effects of carbachol (compare to

1002 panel F;  $p < 0.02$ ; unpaired t-test). A-G. Error bars are SDs, and the time of drug application

1003 is shown by the horizontal bar in each graph. N indicates the number of cells in each data

1004 set. The time course of EPSP slope for individual cells is shown by the faint colored lines.

1005 H. Summary of slopes measured from average EPSPs for the first 10 minutes after drug

1006 application. Each point is the measurement for a single cell; light grey points with a black

1007 outline are from data in the second set of experiments. Boxes indicate the median and

1008 interquartile distances.

1009

1010 Figure 5. Summary of pharmacological activation and receptor block on excitability of layer

1011 2/3 pyramidal cells. A. Responses of a cell to injections of current in control conditions with

1012 a +100 pA pulse (blue traces) and  $\pm$ 200 pA pulses (black traces). B. Responses of the

1013 same cell to the same current pulses in the presence of 20  $\mu$ M carbachol. Carbachol

1014 increases the firing rate at both depolarizing current levels. C. Summary of firing rate with  
1015 current level for control (black) and in the presence of carbachol (red). Carbachol increases  
1016 the slope of the FI curve. D. Application of Oxotremorine-M (3  $\mu$ M) also increases the firing  
1017 rate with increasing current. E. Pirenzepine (75 nM) reduces the effect of carbachol. F. A  
1018 higher concentration of pirenzepine (10  $\mu$ M) completely blocks the effects of carbachol. G.  
1019 Control showing increased firing in to 20  $\mu$ M carbachol in the presence of DMSO. H. The  
1020 M1-receptor specific antagonist VU0255035 blocks the effects of carbachol.

1021

1022 Figure 6: mAChR activation modulates STDP. A. Summary of effects of carbachol (20 $\mu$ M)  
1023 on pre-before-post pairing STDP at +10ms, as in Figure 2A. Carbachol (20  $\mu$ M) reduces  
1024 tLTP. Solid line shows mean; error bars are 1 SD. The dashed line shows tLTP at +10 ms in  
1025 control conditions (from Figure 2A). Gray lines show individual cells. B. The mAChR specific  
1026 agonist Oxo-M also reduces tLTP. C. Eserine (1 $\mu$ M) likewise reduces tLTP after at +10ms.  
1027 D. 4-DAMP and pirenzepine appear to not reverse carbachol's suppression of tLTP, but the  
1028 effect is not significant. E. The M1-specific antagonist VU025035 does not prevent  
1029 carbachol's effect on tLTP. F. Blocking M1 and M3 receptors with 4-DAMP and pirenzepine  
1030 appears to prevent the reduction in tLTP produced by Oxo-M, but the effect is not  
1031 significant. G. Chelating calcium with BAPTA prevents tLTP and induces a long-term LTD.  
1032 H. Summary of EPSP slope changes for each manipulation. Boxes show mean, 25-75%  
1033 and 5-95% (whiskers). Individual cells are coded according to when the data was collected  
1034 (first set of experiments; solid black; second set, light gray with black outline).  $S/S_0$  is the  
1035 ratio of the EPSP slope relative to the baseline slope. "S" with arrow indicates the time that  
1036 the pairing protocol was applied.

1037



1038 Figure 7. Summary of exploratory experiments at  $-10$  and  $+50$  ms. Data presentation  
1039 format is the same as Figure 6. A. Carbachol appears to reduce tLTD at  $-10$  ms intervals,  
1040 but the effect is not significant. B. Eserine has no effect on tLTD produced at  $-10$  ms  
1041 intervals. C. 10 mM internal BAPTA has no effect on the tLTD produced at  $-10$  ms intervals.  
1042 D. Carbachol appears to prevent pre-before-post tLTP at  $+50$  ms intervals. Dashed r lines in  
1043 each panel indicate the mean of the corresponding timing STDP data from Figure 2.  $S/S_0$  is  
1044 the ratio of the EPSP slope relative to the baseline slope. "S" with arrow indicates the time  
1045 that the pairing protocol was applied.

1046  
1047 Figure 8: Activation of mAChRs reduces synaptically evoked NMDA currents. A. NMDA  
1048 mediated synaptic currents were isolated by bathing the slice with CNQX ( $10\mu\text{M}$ ) and  
1049 picrotoxin ( $50\mu\text{M}$ ), and cells were voltage clamped at  $+40\text{mV}$ . Carbachol ( $20\mu\text{M}$ , 5mins)  
1050 reversibly reduced the amplitude of the isolated NMDA current. Black trace is control, red  
1051 trace is carbachol, grey is after carbachol washout. B. Summary of carbachol reduction of  
1052 NMDA currents (\*,  $p < 0.05$ , paired-t-test,  $N=13$  cells). C. The paired pulse ratio (PPR) of the  
1053 NMDA receptor currents measured at a 50 ms interval was unaffected by carbachol ( $p >$   
1054  $0.05$ , paired t-test,  $N=7$  cells), suggesting a postsynaptic site of action. Horizontal blue bars  
1055 in B and C show the means for each condition.

1056  
1057 Figure 9. Stimulating and recording arrangement and protocols for calcium imaging  
1058 experiments. A. Bright-field image showing cells in layer 2/3 and the location of the  
1059 stimulating pipette and recording electrode. B. Fluorescent image of the field in A, showing  
1060 a dye-filled pyramidal cell and the position of the stimulating pipette near the proximal  
1061 dendrite. The white and gray boxes outline the ROIs analyzed (in an  $8 \times 8$  binned image),

1062 and the white box indicates the ROI with the largest response to combined extracellular  
1063 stimulation and evoked action potentials. In this case, this largest response occurred from  
1064 the ROI closest to the stimulating electrode. C. Stimulation protocol pattern used in the  
1065 imaging experiments. Four conditions (1: presynaptic stimulation alone, 2: presynaptic  
1066 stimulation with postsynaptic action potentials at +50 ms, 3: presynaptic stimulation with  
1067 postsynaptic action potentials elicited at +10 ms, and 4: postsynaptic action potentials  
1068 alone) were interleaved and repeated over a 15-minute period. 20  $\mu$ M carbachol was bath-  
1069 applied to the slice starting at 4 minutes, and ending at 9 minutes.

1070

1071 Figure 10: mAChR activation increases action potential evoked calcium influx in layer 2/3  
1072 pyramidal neuron dendrites. A-E. Experiments performed using the low-affinity indicator  
1073 Fluo5F (N=14 cells). A1. Spike trains evoked by somatic current pulses were used to  
1074 depolarize cells 50 ms after a presynaptic EPSP. Traces are average voltages during the  
1075 control period (0-5 minutes in Figure 9). Black trace: no EPSP, red trace, with EPSP. A2.  
1076 Calcium transients from a dendritic region of interest recorded simultaneously with the  
1077 traces in A1. In the selected ROIs (see text), the pairing of the EPSP and AP produced a  
1078 larger calcium transient than associated with the AP alone. A3. Summary of the integrated  
1079 fluorescence signal compared between the two conditions. The fluorescence signal from the  
1080 50 ms EPSP-AP interval data was used to select the ROI that showed the largest increase  
1081 with the EPSP. Each cell is consistently shown in a different color in A3-G3. See text for  
1082 statistical analysis. B1-B3. Similar to A1-A3, except with a +10 ms EPSP-AP interval (blue  
1083 trace with EPSP). The integrated responses in B3 for the +10-ms interval were from the  
1084 same ROI's selected in A3 for the 50-ms interval. C1-C3. EPSPs alone do not lead to  
1085 detectable calcium-dependent fluorescence transients. D1-D3. APs alone produce a  
1086 calcium signal that is increased in the presence of carbachol. E1-E3. No calcium signals

1087 were detected when only EPSPs were generated in the presence of carbachol. In D and E,  
1088 the black traces show responses in control conditions and the grey traces show responses  
1089 in the presence of carbachol. F1-F3. In the presence of carbachol, pairing EPSPs 50 ms  
1090 (magenta trace) prior to APs leads to a small but significant increase in the calcium signal.  
1091 G1-G3: There was no difference in the calcium signal with +10 ms pairing (dark green trace  
1092 is with EPSP). All data shown in A1, A2, B1, B2, C1, C2, D1, D2, E1, E2, F1 and F2 are  
1093 from one cell. H-N. Recordings from a different cell using Asante Calcium Red as the  
1094 calcium indicator (N=7 cells), with the same conditions as shown in panels H-N, show a  
1095 similar pattern of results. The calibration bar in A1 applies to B1-G1 and H1-N1. The  
1096 calibration bar in A2 applies to B2-G2. The calibration bar in H2 applies to I2-N2. Dashed  
1097 lines in A1-G1 and H1-N1 indicate the resting potential. Dashed lines in A2-N2 indicate  
1098 resting fluorescence signals. Asterisks indicate statistically significant differences: \*=p<0.05;  
1099 \*\*=p<0.01; \*\*\*=p<0.002 (see text for details).

05 July 2019

1100

1101 **References**

1102 **Abbott LF, Nelson SB.** Synaptic plasticity: taming the beast. *Nat Neurosci* 3: 1178–  
1103 1183, 2000.

1104 **Allen CB, Celikel T, Feldman DE.** Long-term depression induced by sensory  
1105 deprivation during cortical map plasticity in vivo. *Nat Neurosci* 6: 291–299, 2003.

1106 **Atencio CA, Sharpee TO.** Multidimensional receptive field processing by cat primary  
1107 auditory cortical neurons. *Neuroscience* 359: 130–141, 2017.

1108 **Atzori M, Kanold PO, Pineda JC, Flores-Hernandez J, Paz RD.** Dopamine prevents  
1109 muscarinic-induced decrease of glutamate release in the auditory cortex. *Neuroscience*  
1110 134: 1153–1165, 2005.

1111 **Bajo VM, Leach ND, Cordery PM, Nodal FR, King AJ.** The cholinergic basal forebrain  
1112 in the ferret and its inputs to the auditory cortex. *Eur J Neurosci* 40: 2922–2940, 2014.

1113 **Basura GJ, Koehler SD, Shore SE.** Bimodal stimulus timing-dependent plasticity in  
1114 primary auditory cortex is altered after noise exposure with and without tinnitus. *J*  
1115 *Neurophysiol* 114: 3064–3075, 2015.

1116 **Bender VA.** Two Coincidence Detectors for Spike Timing-Dependent Plasticity in  
1117 Somatosensory Cortex. *J Neurosci* 26: 4166–4177, 2006.

1118 **Bi GQ, Poo MM.** Distributed synaptic modification in neural networks induced by  
1119 patterned stimulation. *Nature* , 1999. doi:10.1038/44573.

1120 **Buckley NJ, Bonner TI, Buckley CM, Brann MR.** Antagonist binding properties of five  
1121 cloned muscarinic receptors expressed in CHO-K1 cells. [Online]. *Mol Pharmacol* 35: 469–  
1122 76, 1989<http://www.ncbi.nlm.nih.gov/pubmed/2704370>.

1123 **Buonomano D V, Merzenich MM.** Cortical Plasticity: From Synapses to Maps. *Ann*

1124 *Rev Neurosci* 21: 1765–1774, 1998.

1125 **Campagnola L, Kratz MB, Manis PB.** ACQ4: an open-source software platform for  
1126 data acquisition and analysis in neurophysiology research. *Front Neuroinform* 8: 3, 2014.

1127 **Chang EF, Merzenich MM.** Environmental noise retards auditory cortical development.  
1128 *Science* 300: 498–502, 2003.

1129 **Chen X, Leischner U, Rochefort NL, Nelken I, Konnerth A.** Functional mapping of  
1130 single spines in cortical neurons in vivo. *Nature* 475: 501–505, 2011.

1131 **Cho K-H, Jang H-J, Lee E-H, Yoon SH, Hahn SJ, Jo Y-H, Kim M-S, Rhie D-J.**  
1132 Differential cholinergic modulation of Ca<sup>2+</sup> transients evoked by backpropagating action  
1133 potentials in apical and basal dendrites of cortical pyramidal neurons. *J Neurophysiol* 99:  
1134 2833–2843, 2008.

1135 **Clarke S, de Ribaupierre F, Rouiller EM, de Ribaupierre Y.** Several neuronal and  
1136 axonal types form long intrinsic connections in the cat primary auditory cortical field (A1).  
1137 *Anat Embryol (Berl)* 188: 117–138, 1993.

1138 **Cormier RJ, Greenwood AC, Connor JA.** Bidirectional Synaptic Plasticity Correlated  
1139 With the Magnitude of Dendritic Calcium Transients Above a Threshold. *J Neurophysiol* 85:  
1140 399–406, 2001.

1141 **Couey JJ, Meredith RM, Spijker S, Poorthuis RB, Smit AB, Brussaard AB,**  
1142 **Mansvelder HD.** Distributed network actions by nicotine increase the threshold for spike-  
1143 timing-dependent plasticity in prefrontal cortex [Online]. *Neuron* 54: 73–87,  
1144 2007<http://www.cell.com/neuron/retrieve/pii/S0896627307001845>.

1145 **Cruikshank SJ, Rose HJ, Metherate R.** Auditory thalamocortical synaptic transmission  
1146 in vitro. *J Neurophysiol* 87: 361–384, 2002.

1147 **D'amour JA, Froemke RC.** Inhibitory and Excitatory Spike-Timing-Dependent Plasticity  
1148 in the Auditory Cortex. *Neuron* 86: 514–528, 2015.

- 1149       **Dahmen JC, Hartley DEH, King AJ.** Stimulus-Timing-Dependent Plasticity of Cortical  
1150 Frequency Representation. *J Neurosci* 28: 13629–13639, 2008.
- 1151       **Dobrunz LE, Stevens CF.** Heterogeneity of Release Probability, Facilitation, and  
1152 Depletion at Central Synapses. *Neuron* 18: 995–1008, 1997.
- 1153       **Douglas R, Koch C, Mahowald M, Martin K, Suarez H.** Recurrent excitation in  
1154 neocortical circuits. *Science* 269: 981–985, 1995.
- 1155       **Eilers J, Augustine GJ, Konnerth A.** Subthreshold synaptic Ca<sup>2+</sup> signalling in fine  
1156 dendrites and spines of cerebellar Purkinje neurons. *Nature* 373: 155–158, 1995.
- 1157       **Flores-Hernandez J, Salgado H, De La Rosa V, Avila-Ruiz T, Torres-Ramirez O,**  
1158 **Lopez-Lopez G, Atzori M.** Cholinergic direct inhibition of N-methyl-D aspartate receptor-  
1159 mediated currents in the rat neocortex. *Synapse* 63: 308–318, 2009.
- 1160       **Froemke RC, Merzenich MM, Schreiner CE.** A synaptic memory trace for cortical  
1161 receptive field plasticity. *Nature* 450: 425–429, 2007.
- 1162       **Froemke RC, Tsay IA, Raad M, Long JD, Dan Y.** Contribution of individual spikes in  
1163 burst-induced long-term synaptic modification. *J Neurophysiol* 95: 1620–1629, 2006.
- 1164       **Graupner M.** Mechanisms of induction and maintenance of spike-timing dependent  
1165 plasticity in biophysical synapse models. *Front Comput Neurosci* 4, 2010.
- 1166       **Gu Z, Yakel JL.** Timing-dependent septal cholinergic induction of dynamic hippocampal  
1167 synaptic plasticity. *Neuron* 71: 155–165, 2011.
- 1168       **Harper NS, Schoppe O, Willmore BDB, Cui Z, Schnupp JWH, King AJ.** Network  
1169 Receptive Field Modeling Reveals Extensive Integration and Multi-feature Selectivity in  
1170 Auditory Cortical Neurons. *PLoS Comput Biol* , 2016. doi:10.1371/journal.pcbi.1005113.
- 1171       **Hohmann CF, Berger-Sweeney J.** Cholinergic regulation of cortical development and  
1172 plasticity. New twists to an old story. *Perspect Dev Neurobiol* 5: 401–425, 1998.
- 1173       **Hohmann CF, Potter ED, Levey AI.** Development of muscarinic receptor subtypes in

1174 the forebrain of the mouse. *J Comp Neurol* 358: 88–101, 1995.

1175 **Hsieh CY, Cruikshank SJ, Metherate R.** Differential modulation of auditory

1176 thalamocortical and intracortical synaptic transmission by cholinergic agonist. *Brain Res*

1177 880: 51–64, 2000.

1178 **Hubel DH, Wiesel TN.** Binocular interaction in the striate cortex of kittens reared with

1179 artificial squint. *J Neurophysiol* 28: 1041–1059, 1965.

1180 **Hycr KL, Minta A, Escamilla PR, Chan PPL, Meshik XA, Goldberg MP.** Synthesis

1181 and properties of Asante Calcium Red--a novel family of long excitation wavelength calcium

1182 indicators. *Cell Calcium* 54: 320–333, 2013.

1183 **Intskirveli I, Joshi A, Vizcarra-Chacón BJ, Metherate R.** Spectral breadth and

1184 laminar distribution of thalamocortical inputs to A1. *J Neurophysiol* 115: 2083–2094, 2016.

1185 **Issa JB, Haeffele BD, Agarwal A, Bergles DE, Young ED, Yue DT.** Multiscale Optical

1186 Ca<sup>2+</sup> Imaging of Tonal Organization in Mouse Auditory Cortex. *Neuron* 83: 944–959, 2014.

1187 **Jacob V, Brasier DJ, Erchova I, Feldman D, Shulz DE.** Spike Timing-Dependent

1188 Synaptic Depression in the In Vivo Barrel Cortex of the Rat. *J Neurosci* 27: 1271–1284,

1189 2007.

1190 **Jo J, Son GH, Winters BL, Kim MJ, Whitcomb DJ, Dickinson BA, Lee Y-B, Futai K,**

1191 **Amici M, Sheng M, Collingridge GL, Cho K.** Muscarinic receptors induce LTD of NMDAR

1192 EPSCs via a mechanism involving hippocalcin, AP2 and PSD-95. *Nat Neurosci* 13: 1216–

1193 1224, 2010.

1194 **Kadia SC, Wang X.** Spectral integration in A1 of awake primates: neurons with single-

1195 and multip peaked tuning characteristics. *J Neurophysiol* 89: 1603–1622, 2003.

1196 **Kanold PO, Nelken I, Polley DB.** Local versus global scales of organization in auditory

1197 cortex. *Trends Neurosci* 37: 502–510, 2014.

1198 **Karmarkar UR, Najarian MT, Buonomano D V.** Mechanisms and significance of



1199 spike-timing dependent plasticity. *Biol Cybern* 87: 373–382, 2002.

1200 **Kaur S, Lazar R, Metherate R.** Intracortical Pathways Determine Breadth of  
1201 Subthreshold Frequency Receptive Fields in Primary Auditory Cortex. *J Neurophysiol* 91:  
1202 2551–2567, 2004.

1203 **Kaur S, Rose HJ, Lazar R, Liang K, Metherate R.** Spectral integration in primary  
1204 auditory cortex: laminar processing of afferent input, in vivo and in vitro. *Neuroscience* 134:  
1205 1033–1045, 2005.

1206 **Kilgard MP.** Cortical Map Reorganization Enabled by Nucleus Basalis Activity. *Science*  
1207 279: 1714–1718, 1998.

1208 **Koester HJ, Sakmann B.** Calcium dynamics in single spines during coincident pre- and  
1209 postsynaptic activity depend on relative timing of back-propagating action potentials and  
1210 subthreshold excitatory postsynaptic potentials. *Proc Natl Acad Sci* 95: 9596–9601, 1998.

1211 **Kotak VC, Breithaupt AD, Sanes DH.** Developmental hearing loss eliminates long-  
1212 term potentiation in the auditory cortex. *Proc Natl Acad Sci* 104: 3550–3555, 2007.

1213 **Kratz MB, Manis PB.** Spatial organization of excitatory synaptic inputs to layer 4  
1214 neurons in mouse primary auditory cortex. *Front Neural Circuits* 9, 2015.

1215 **Krause BM, Raz A, Uhlrich DJ, Smith PH, Banks MI.** Spiking in auditory cortex  
1216 following thalamic stimulation is dominated by cortical network activity. *Front Syst Neurosci*  
1217 8, 2014.

1218 **Kuchibhotla K V, Gill J V, Lindsay GW, Papadoyannis ES, Field RE, Sten TAH,**  
1219 **Miller KD, Froemke RC.** Parallel processing by cortical inhibition enables context-  
1220 dependent behavior. *Nat Neurosci* 20: 62–71, 2017.

1221 **Kumar A, Schiff O, Barkai E, Mel BW, Polog-Polsky A, Schiller J.** NMDA spikes  
1222 mediate amplification of inputs in the rat piriform cortex. *Elife* 7, 2018.

1223 **Larsen RS, Rao D, Manis PB, Philpot BD.** STDP in the Developing Sensory

1224 Neocortex. *Front Synaptic Neurosci* 2: 9, 2010.

1225 **Leach ND, Nodal FR, Cordery PM, King AJ, Bajo VM.** Cortical cholinergic input is  
1226 required for normal auditory perception and experience-dependent plasticity in adult ferrets.  
1227 *J Neurosci* 33: 6659–6671, 2013.

1228 **Letzkus JJ, Wolff SBE, Meyer EMM, Tovote P, Courtin J, Herry C, Lüthi A.** A  
1229 disinhibitory microcircuit for associative fear learning in the auditory cortex. *Nature* 480:  
1230 331–335, 2011.

1231 **Lewicki MS.** Efficient coding of natural sounds. *Nat Neurosci* 5: 356–363, 2002.

1232 **Linden DJ.** The Return of the Spike. *Neuron* 22: 661–666, 1999.

1233 **Lisman JE, Fellous J-M, Wang X-J.** A role for NMDA-receptor channels in working  
1234 memory. *Nat Neurosci* 1: 273–275, 1998.

1235 **Liu B, Wu GK, Arbuckle R, Tao HW, Zhang LI.** Defining cortical frequency tuning with  
1236 recurrent excitatory circuitry. *Nat Neurosci* 10: 1594–1600, 2007.

1237 **Magee JC, Johnston D.** A Synaptically Controlled, Associative Signal for Hebbian  
1238 Plasticity in Hippocampal Neurons. *Science* 275: 209–213, 1997.

1239 **Malenka R, Kauer J, Zucker R, Nicoll R.** Postsynaptic calcium is sufficient for  
1240 potentiation of hippocampal synaptic transmission. *Science* 242: 81–84, 1988.

1241 **Markram H.** Regulation of Synaptic Efficacy by Coincidence of Postsynaptic APs and  
1242 EPSPs. *Science* 275: 213–215, 1997.

1243 **Martins ARO, Froemke RC.** Coordinated forms of noradrenergic plasticity in the locus  
1244 coeruleus and primary auditory cortex. *Nat Neurosci* , 2015. doi:10.1038/nn.4090.

1245 **Matsubara JA, Phillips DP.** Intracortical connections and their physiological correlates  
1246 in the primary auditory cortex (AI) of the cat. *J Comp Neurol* 268: 38–48, 1988.

1247 **McCoy PA, McMahon LL.** Muscarinic Receptor–Dependent Long-Term Depression in  
1248 Rat Visual Cortex Is PKC Independent but Requires ERK1/2 Activation and Protein

1249 Synthesis. *J Neurophysiol* 98: 1862–1870, 2007.

1250 **Metherate R, Ashe JH.** Basal forebrain stimulation modifies auditory cortex  
1251 responsiveness by an action at muscarinic receptors. *Brain Res* 559: 163–167, 1991.

1252 **Metherate R, Ashe JH.** Synaptic interactions involving acetylcholine, glutamate, and  
1253 GABA in rat auditory cortex. *Exp Brain Res* 107: 59–72, 1995.

1254 **Metherate R, Kaur S, Kawai H, Lazar R, Liang K, Rose HJ.** Spectral integration in  
1255 auditory cortex: mechanisms and modulation. *Hear Res* 206: 146–158, 2005.

1256 **Metherate R, Weinberger NM.** Acetylcholine produces stimulus-specific receptive field  
1257 alterations in cat auditory cortex. *Brain Res* 480: 372–377, 1989.

1258 **Metherate R, Weinberger NM.** Cholinergic modulation of responses to single tones  
1259 produces tone-specific receptive field alterations in cat auditory cortex. *Synapse* 6: 133–  
1260 145, 1990.

1261 **Müller W, Connor JA.** Dendritic spines as individual neuronal compartments for  
1262 synaptic Ca<sup>2+</sup> responses. *Nature* 354: 73–76, 1991.

1263 **Nevian T, Sakmann B.** Spine Ca<sup>2+</sup> Signaling in Spike-Timing-Dependent Plasticity. *J*  
1264 *Neurosci* 26: 11001–11013, 2006.

1265 **Nishiyama M, Hong K, Mikoshiba K, Poo M, Kato K.** Calcium stores regulate the  
1266 polarity and input specificity of synaptic modification. *Nature* 408: 584–588, 2000.

1267 **Nowak L, Bregestovski P, Ascher P, Herbet A, Prochiantz A.** Magnesium gates  
1268 glutamate-activated channels in mouse central neurones. *Nature* , 1984.  
1269 doi:10.1038/307462a0.

1270 **Ojima H.** Intracellular Characterization of Suppressive Responses in Supragranular  
1271 Pyramidal Neurons of Cat Primary Auditory Cortex In Vivo. *Cereb Cortex* 12: 1079–1091,  
1272 2002.

1273 **Ojima H, Honda CN, Jones EG, Research F.** Patterns of Axon Collateralization of

1274 Identified Supragranular Pyramidal Neurons in the Cat Auditory Cortex. *Cereb Cortex* 80–  
1275 94, 1991.

1276 **Peralta EG, Ashkenazi A, Winslow JW, Smith DH, Ramachandran J, Capon DJ.**

1277 Distinct primary structures, ligand-binding properties and tissue-specific expression of four  
1278 human muscarinic acetylcholine receptors. *EMBO J*, 1987.

1279 **Philpot BD, Sekhar AK, Shouval HZ, Bear MF, Systems N.** Visual Experience and

1280 Deprivation Bidirectionally Modify the Composition and Function of NMDA Receptors in  
1281 Visual Cortex. *Neuron* 29: 157–169, 2001a.

1282 **Philpot BD, Weisberg MP, Ramos MS, Sawtell NB, Tang Y-P, Tsien JZ, Bear MF.**

1283 Effect of transgenic overexpression of NR2B on NMDA receptor function and synaptic  
1284 plasticity in visual cortex. *Neuropharmacology* 41: 762–770, 2001b.

1285 **R Development Core Team.** R: A language and environment for statistical computing.

1286 2018.

1287 **Rao D, Basura GJ, Roche J, Daniels S, Mancilla JG, Manis PB.** Hearing loss alters

1288 serotonergic modulation of intrinsic excitability in auditory cortex. *J Neurophysiol* 104: 2693–  
1289 2703, 2010.

1290 **Read HL, Winer JA, Schreiner CE, Francisco S, Biology C.** Functional architecture

1291 of auditory cortex. *Curr Opin Neurobiol* 12: 433–440, 2002.

1292 **Reinhold K, Lien AD, Scanziani M.** Distinct recurrent versus afferent dynamics in

1293 cortical visual processing. *Nat Neurosci*, 2015. doi:10.1038/nn.4153.

1294 **Robertson R.** Neonatal treatment with 192 IgG-saporin produces long-term forebrain

1295 cholinergic deficits and reduces dendritic branching and spine density of neocortical

1296 pyramidal neurons. *Cereb Cortex* 8: 142–155, 1998.

1297 **Roßner S, Kues W, Witzemann V, Schliebs R.** Laminar expression of m1-, m3- and

1298 m4-muscarinic cholinergic receptor genes in the developing rat visual cortex using in situ

1299 hybridization histochemistry. Effect of monocular visual deprivation. *Int J Dev Neurosci* 11:  
1300 369–378, 1993.

1301 **Ruxton GD.** The unequal variance t-test is an underused alternative to Student's t-test  
1302 and the Mann–Whitney U test. *Behav Ecol* 17: 688–690, 2006.

1303 **Salgado H, Bellay T, Nichols JA, Bose M, Martinolich L, Perrotti L, Atzori M.**  
1304 Muscarinic M<sub>2</sub> and M<sub>1</sub> Receptors Reduce GABA Release by Ca<sup>2+</sup> Channel Modulation  
1305 Through Activation of PI 3 K/Ca<sup>2+</sup>-Independent and PLC/Ca<sup>2+</sup>-Dependent PKC. *J*  
1306 *Neurophysiol* 98: 952–965, 2007.

1307 **Salgado H, García-Oscos F, Dinh L, Atzori M.** Dynamic modulation of short-term  
1308 synaptic plasticity in the auditory cortex: The role of norepinephrine. *Hear Res* 271: 26–36,  
1309 2011.

1310 **Schiller J, Schiller Y, Clapham DE.** NMDA receptors amplify calcium influx into  
1311 dendritic spines during associative pre- and postsynaptic activation. *Nat Neurosci* 1: 114–  
1312 118, 1998.

1313 **Seol GH, Ziburkus J, Huang S, Song L, Kim IT, Takamiya K, Huganir RL, Lee H-K,**  
1314 **Kirkwood A.** Neuromodulators Control the Polarity of Spike-Timing-Dependent Synaptic  
1315 Plasticity. *Neuron* 55: 919–929, 2007.

1316 **Sheffler DJ, Williams R, Bridges TM, Xiang Z, Kane AS, Byun NE, Jadhav S, Mock**  
1317 **MM, Zheng F, Lewis LM, Jones CK, Niswender CM, Weaver CD, Lindsley CW, Conn**  
1318 **PJ.** A Novel Selective Muscarinic Acetylcholine Receptor Subtype 1 Antagonist Reduces  
1319 Seizures without Impairing Hippocampus-Dependent Learning. *Mol Pharmacol* 76: 356–  
1320 368, 2009.

1321 **Shouval HZ, Kalantzis G.** Stochastic Properties of Synaptic Transmission Affect the  
1322 Shape of Spike Time–Dependent Plasticity Curves. *J Neurophysiol* 93: 1069–1073, 2005.

1323 **Sompolinsky H, Shapley R.** New perspectives on the mechanisms for orientation

1324 selectivity. *Curr Opin Neurobiol* 7: 514–522, 1997.

1325 **Song W, Kawaguchi H, Totoki S, Inoue Y, Katura T, Maeda S, Inagaki S, Shirasawa**

1326 **H, Nishimura M.** Cortical Intrinsic Circuits Can Support Activity Propagation through an

1327 Isofrequency Strip of the Guinea Pig Primary Auditory Cortex. *Cereb Cortex* 16: 718–729,

1328 2006.

1329 **Sourdet V.** The Role of Dendritic Filtering in Associative Long-Term Synaptic Plasticity.

1330 *Learn Mem* 6: 422–447, 1999.

1331 **Sugihara H, Chen N, Sur M.** Cell-specific modulation of plasticity and cortical state by

1332 cholinergic inputs to the visual cortex. *J. Physiol. Paris* 2016.

1333 **Sugisaki E, Fukushima Y, Tsukada M, Aihara T.** Cholinergic modulation on spike

1334 timing-dependent plasticity in hippocampal CA1 network. *Neuroscience* 192: 91–101, 2011.

1335 **Takesian AE, Kotak VC, Sanes DH.** Age-dependent effect of hearing loss on cortical

1336 inhibitory synapse function. *J Neurophysiol* 107: 937–947, 2012.

1337 **Tischbirek CH, Noda T, Tohmi M, Birkner A, Nelken I, Konnerth A.** In Vivo

1338 Functional Mapping of a Cortical Column at Single-Neuron Resolution. *Cell Rep* 27: 1319-

1339 1326.e5, 2019.

1340 **Tsien RY.** New calcium indicators and buffers with high selectivity against magnesium

1341 and protons: design, synthesis, and properties of prototype structures. *Biochemistry* 19:

1342 2396–2404, 1980.

1343 **Tsukano H, Horie M, Bo T, Uchimura A, Hishida R, Kudoh M, Takahashi K,**

1344 **Takebayashi H, Shibuki K.** Delineation of a frequency-organized region isolated from the

1345 mouse primary auditory cortex. *J Neurophysiol* 113: 2900–2920, 2015.

1346 **Vidal C, Changeux J-P.** Nicotinic and muscarinic modulations of excitatory synaptic

1347 transmission in the rat prefrontal cortex in vitro. *Neuroscience* 56: 23–32, 1993.

1348 **de Villers-Sidani E, Chang EF, Bao S, Merzenich MM.** Critical Period Window for

1349 Spectral Tuning Defined in the Primary Auditory Cortex (A1) in the Rat. *J Neurosci* 27: 180–  
1350 189, 2007.

1351 **Watkins P V, Kao JPY, Kanold PO.** Spatial pattern of intra-laminar connectivity in  
1352 supragranular mouse auditory cortex. *Front Neural Circuits* 8: 15, 2014.

1353 **Weinberger NM.** Physiological memory in primary auditory cortex: characteristics and  
1354 mechanisms. *Neurobiol Learn Mem* 70: 226–251, 1998.

1355 **Weinberger NM.** The nucleus basalis and memory codes: auditory cortical plasticity  
1356 and the induction of specific, associative behavioral memory. *Neurobiol Learn Mem* 80:  
1357 268–284, 2003.

1358 **Weinberger NM.** New perspectives on the auditory cortex: Learning and memory. In:  
1359 *Handbook of Clinical Neurology*. 2015.

1360 **Wespatat V, Tennigkeit F, Singer W.** Phase Sensitivity of Synaptic Modifications in  
1361 Oscillating Cells of Rat Visual Cortex. *J Neurosci* 24: 9067–9075, 2004.

1362 **Winkowski DE, Kanold PO.** Laminar Transformation of Frequency Organization in  
1363 Auditory Cortex. *J Neurosci* 33: 1498–1508, 2013.

1364 **Wittenberg GM, Wang SS-H.** Malleability of Spike-Timing-Dependent Plasticity at the  
1365 CA3-CA1 Synapse. *J Neurosci* 26: 6610–6617, 2006.

1366 **Woodruff ML, Sampath AP, Matthews HR, Krasnoperova N V., Lem J, Fain GL.**  
1367 Measurement of cytoplasmic calcium concentration in the rods of wild-type and transducin  
1368 knock-out mice. *J Physiol* 542: 843–854, 2002.

1369 **Woolley SMN, Fremouw TE, Hsu A, Theunissen FE.** Tuning for spectro-temporal  
1370 modulations as a mechanism for auditory discrimination of natural sounds. *Nat Neurosci* 8:  
1371 1371–1379, 2005.

1372 **Xu H, Kotak VC, Sanes DH.** Conductive Hearing Loss Disrupts Synaptic and Spike  
1373 Adaptation in Developing Auditory Cortex. *J Neurosci* 27: 9417–9426, 2007.



- 1374 **Yang S-N, Tang Y-G, Zucker RS.** Selective Induction of LTP and LTD by Postsynaptic  
1375  $[Ca^{2+}]_i$  Elevation. *J Neurophysiol* 81: 781–787, 1999.
- 1376 **Yao H, Dan Y.** Stimulus Timing-Dependent Plasticity in Cortical Processing of  
1377 Orientation. *Neuron* 32: 315–323, 2001.
- 1378 **Zhang J, Lau P, Bi G.** Gain in sensitivity and loss in temporal contrast of STDP by  
1379 dopaminergic modulation at hippocampal synapses. *PNAS* 1–6, 2009.
- 1380 **Zhang Y, Dyck RH, Hamilton SE, Nathanson NM, Yan J.** Disrupted tonotopy of the  
1381 auditory cortex in mice lacking M1 muscarinic acetylcholine receptor. *Hear Res* 201: 145–  
1382 155, 2005.
- 1383 **Zhang Y, Hamilton SE, Nathanson NM, Yan J.** Decreased Input-Specific Plasticity of  
1384 the Auditory Cortex in Mice Lacking M1 Muscarinic Acetylcholine Receptors. *Cereb Cortex*  
1385 16: 1258–1265, 2006.
- 1386 **Zhao Y, Tzounopoulos T.** Physiological Activation of Cholinergic Inputs Controls  
1387 Associative Synaptic Plasticity via Modulation of Endocannabinoid Signaling. *J Neurosci* 31:  
1388 3158–3168, 2011.
- 1389 **Zilberter M, Holmgren C, Shemer I, Silberberg G, Grillner S, Harkany T, Zilberter Y.**  
1390 Input Specificity and Dependence of Spike Timing–Dependent Plasticity on Preceding  
1391 Postsynaptic Activity at Unitary Connections between Neocortical Layer 2/3 Pyramidal  
1392 Cells. *Cereb Cortex* 19: 2308–2320, 2009.
- 1393

**A**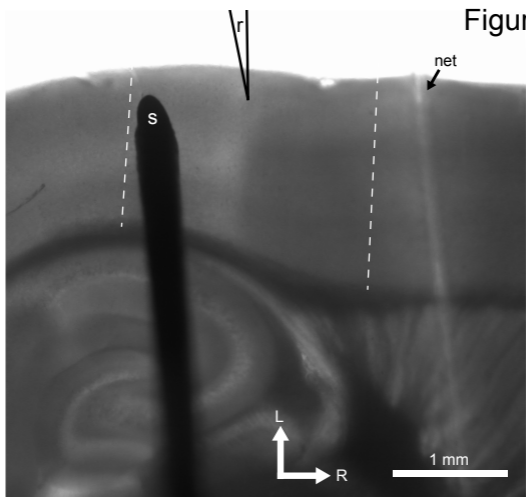**B**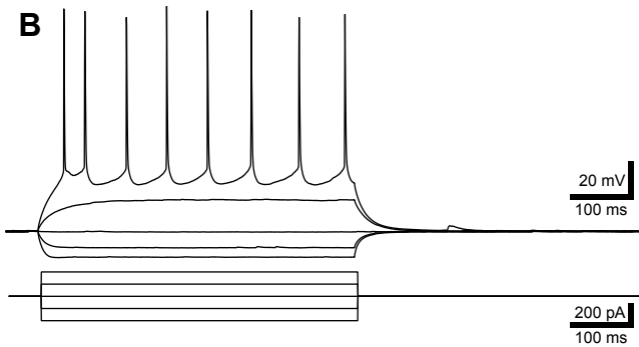

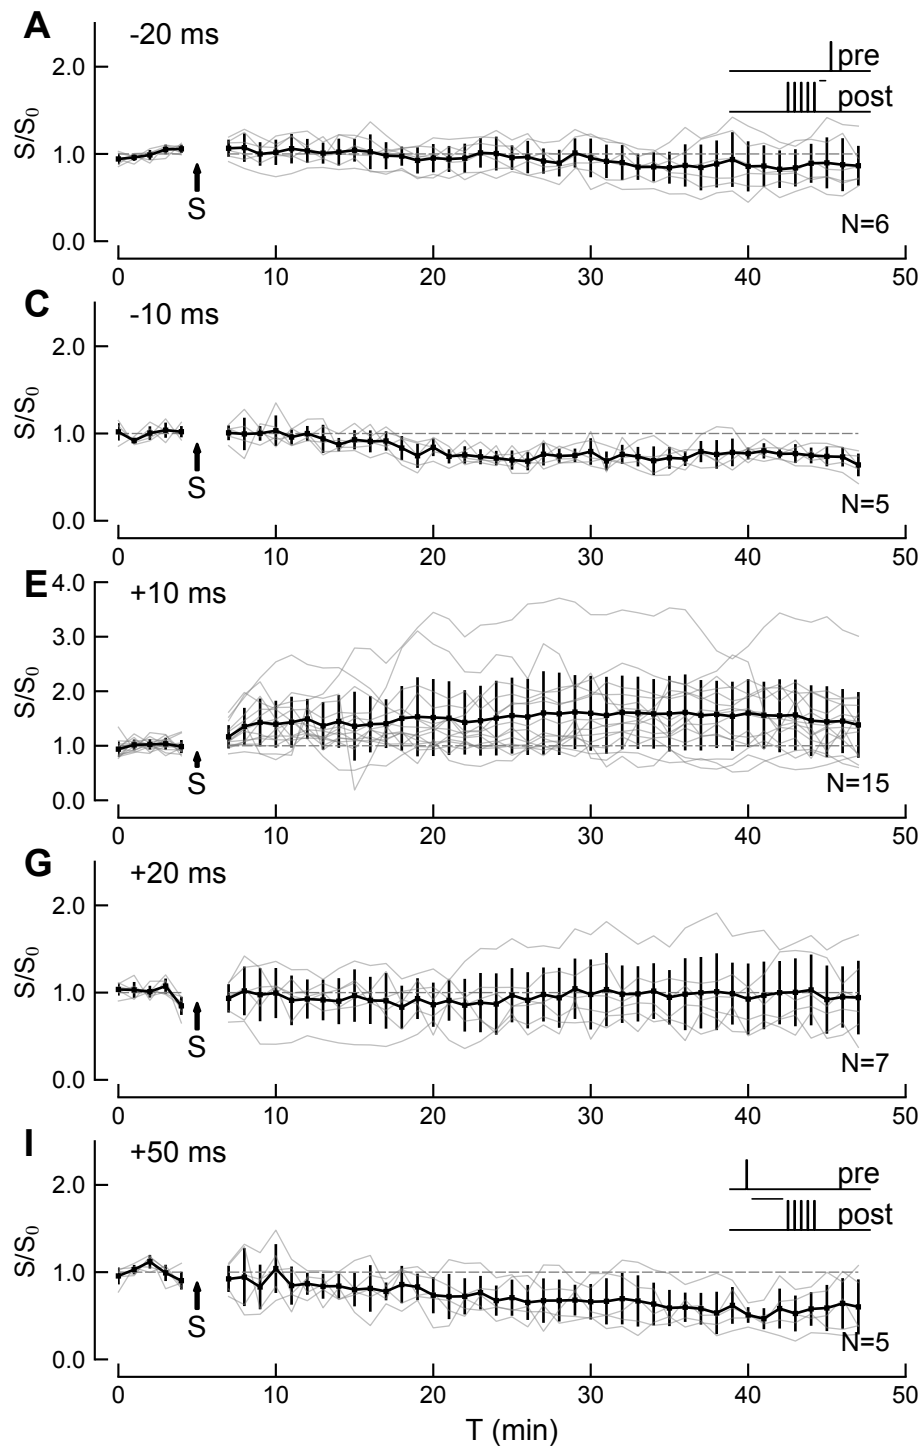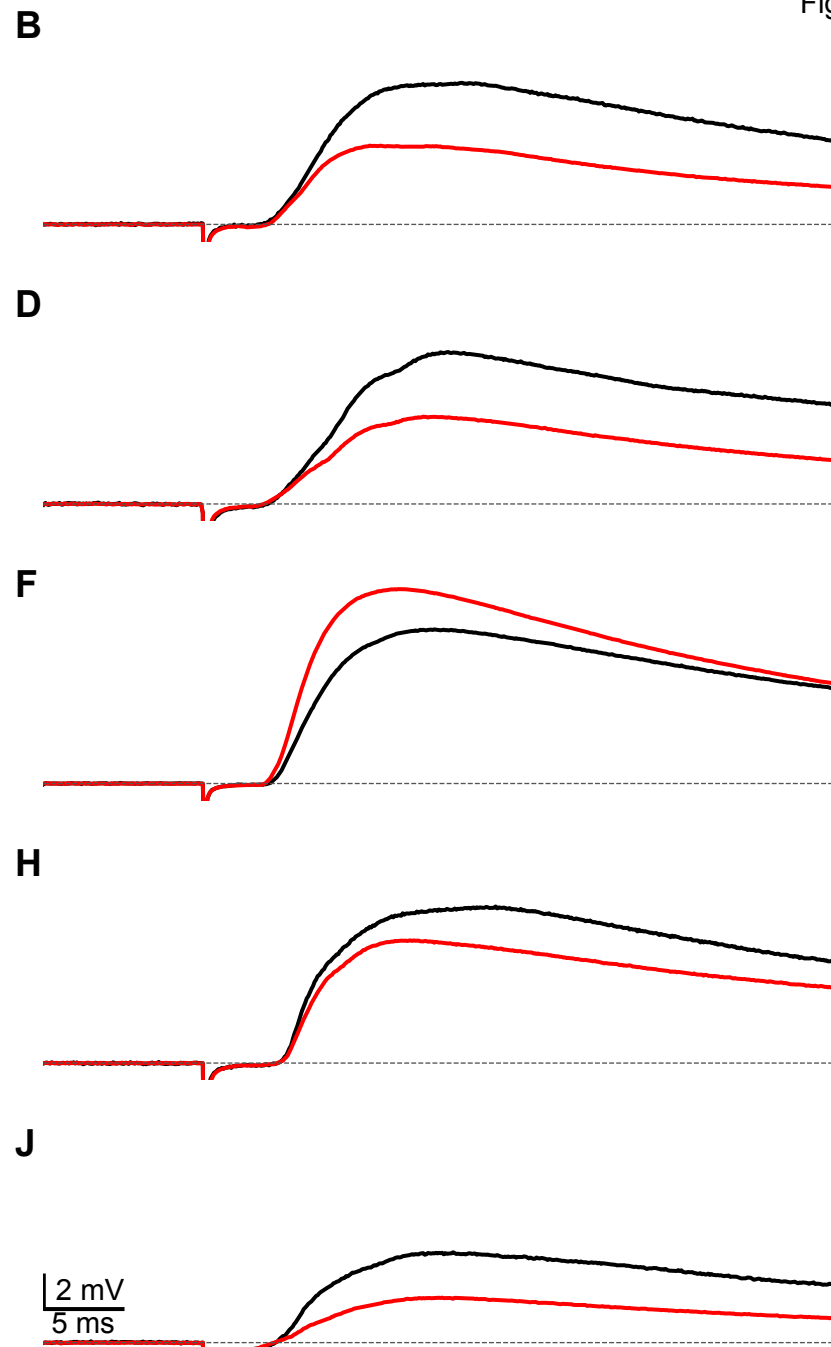

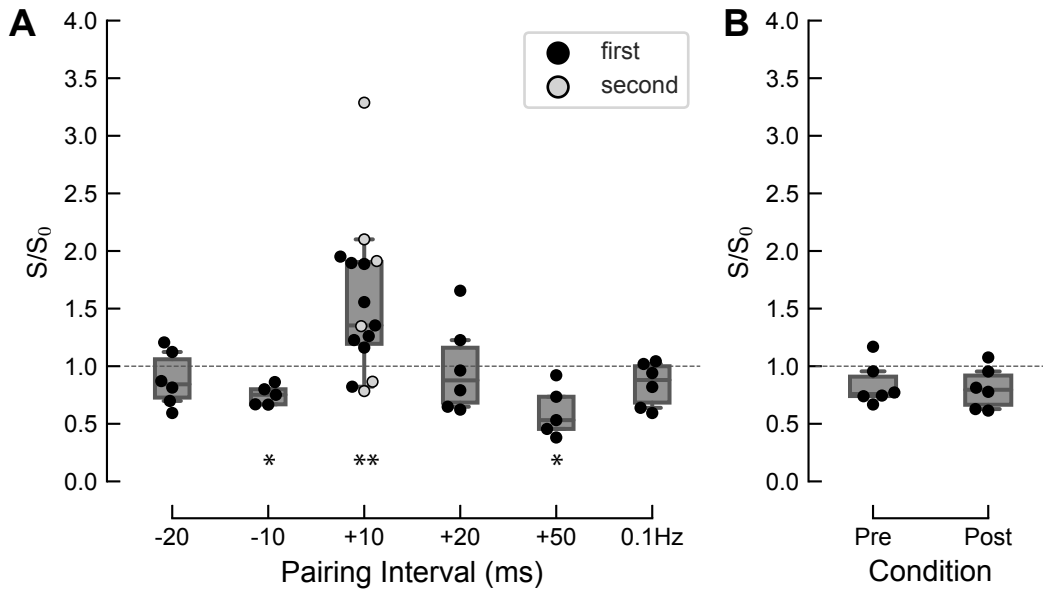

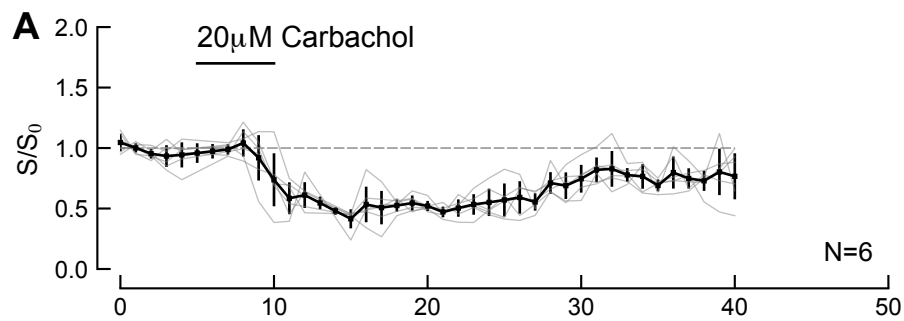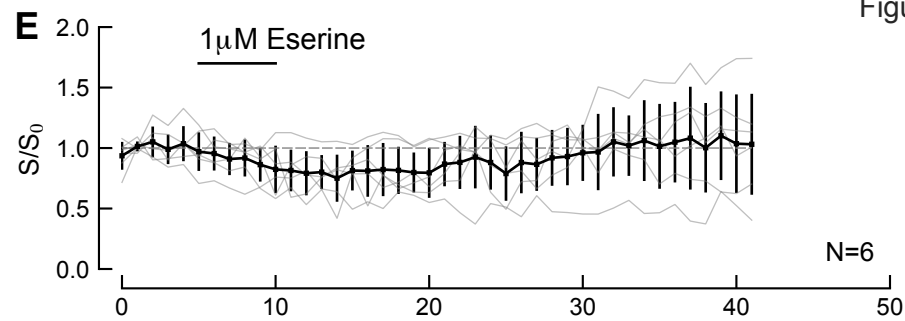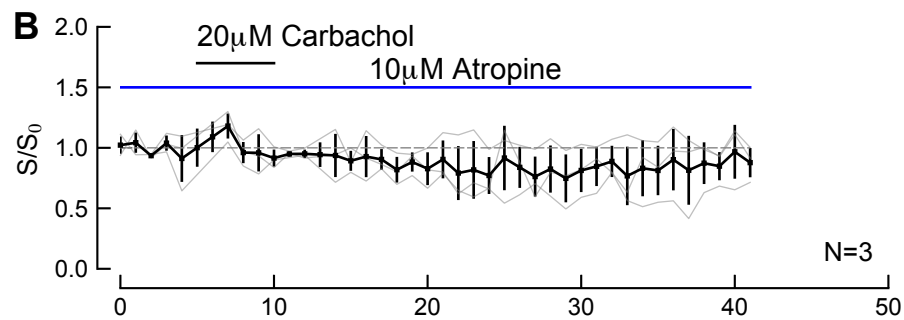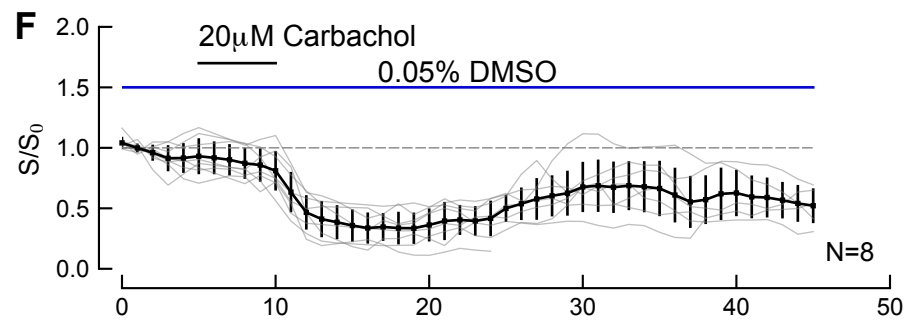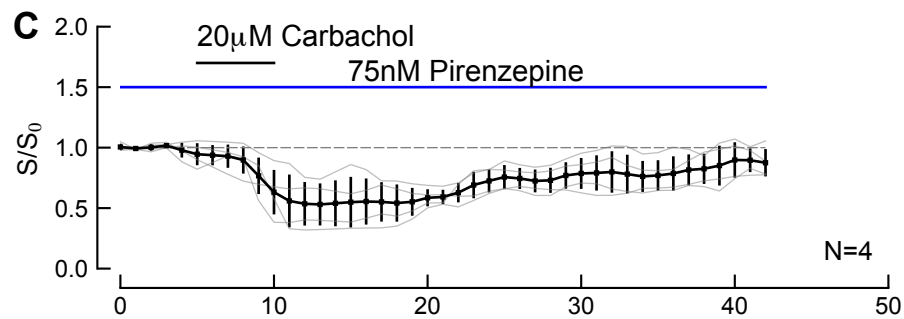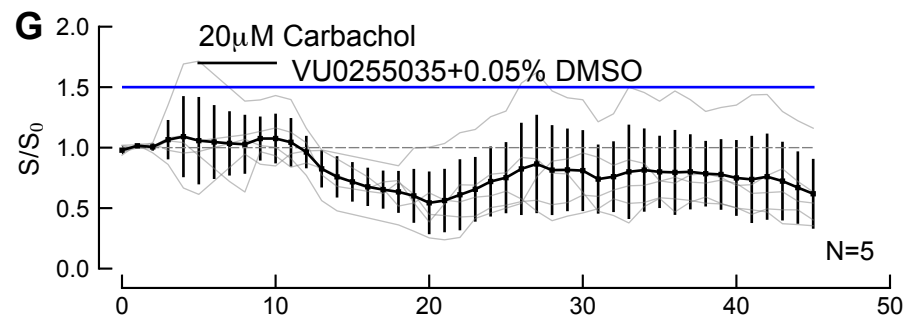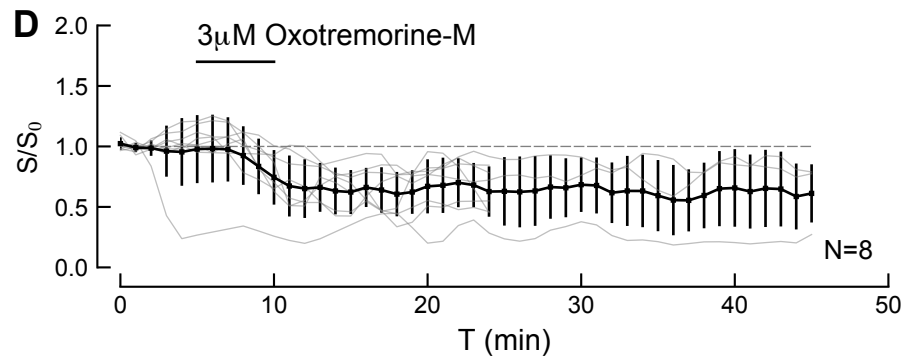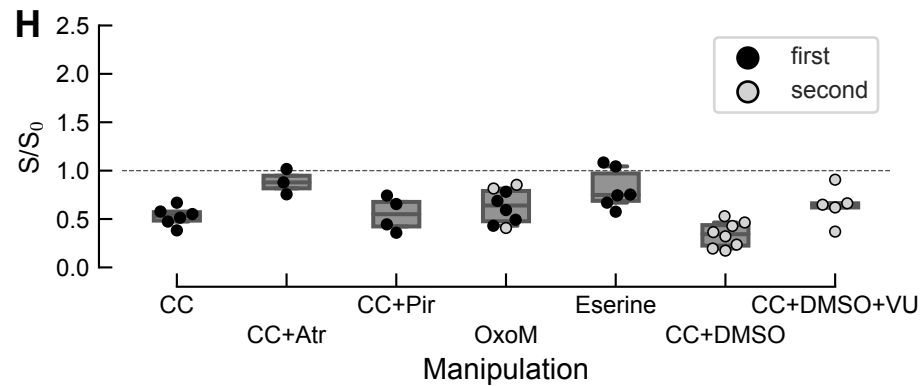

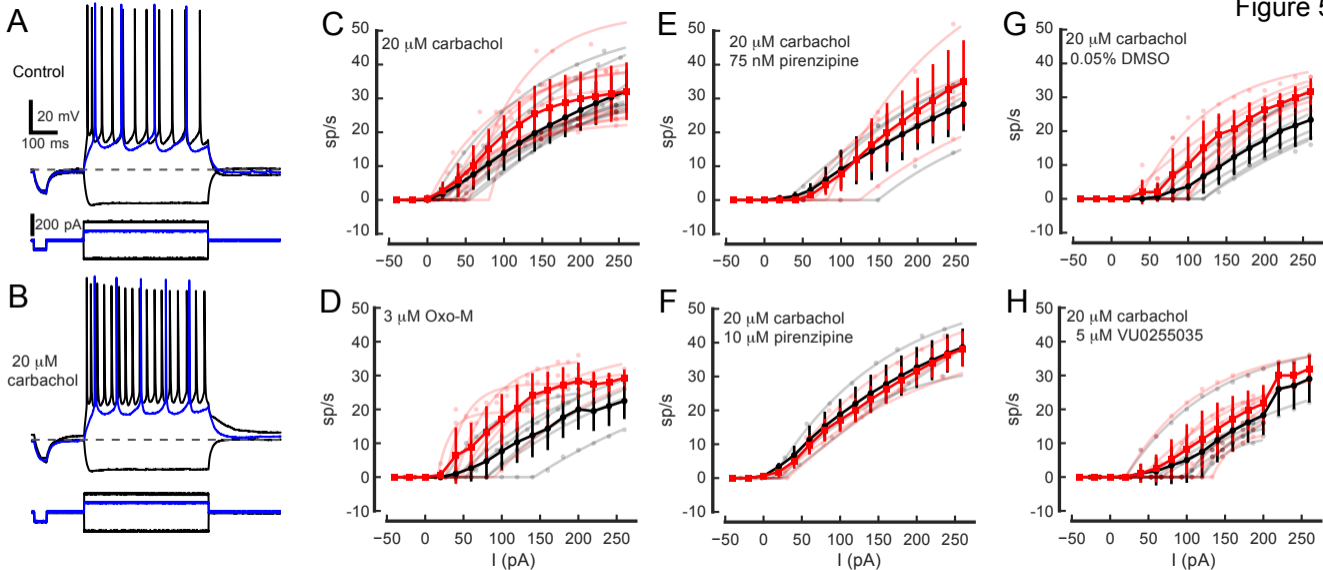

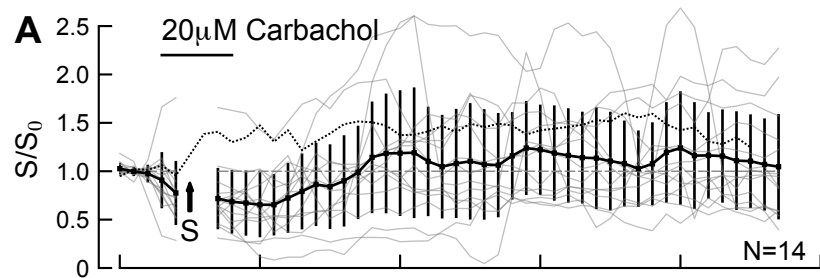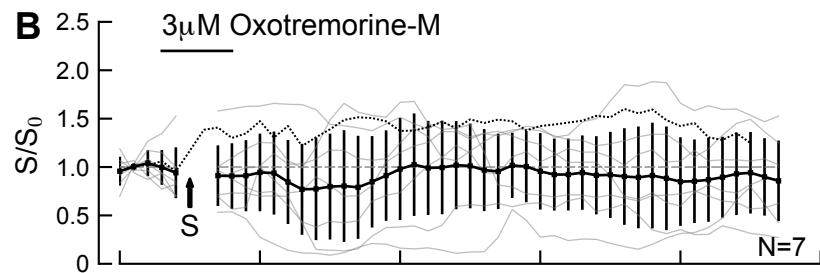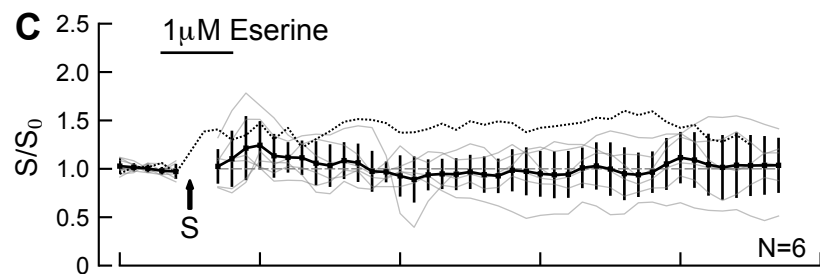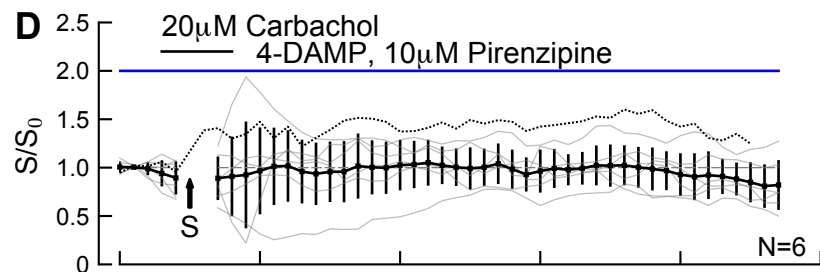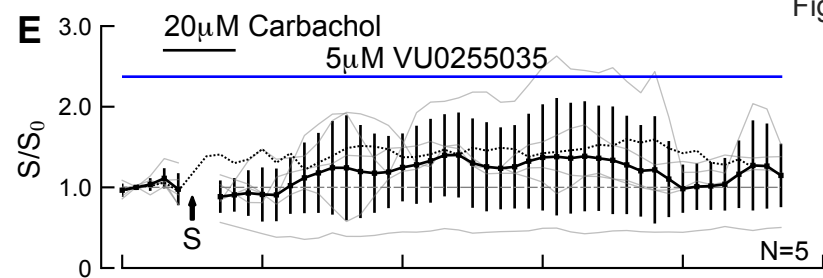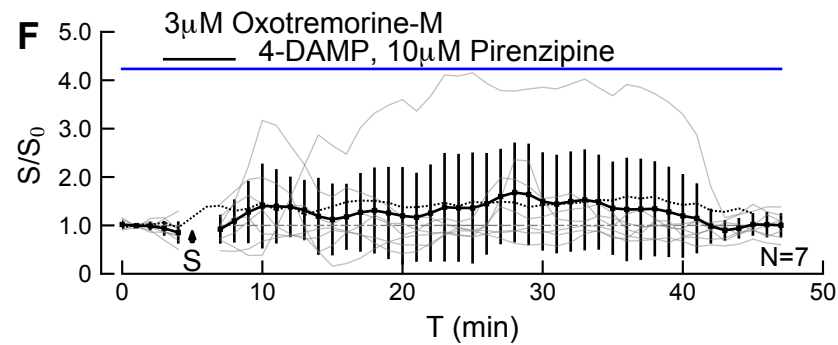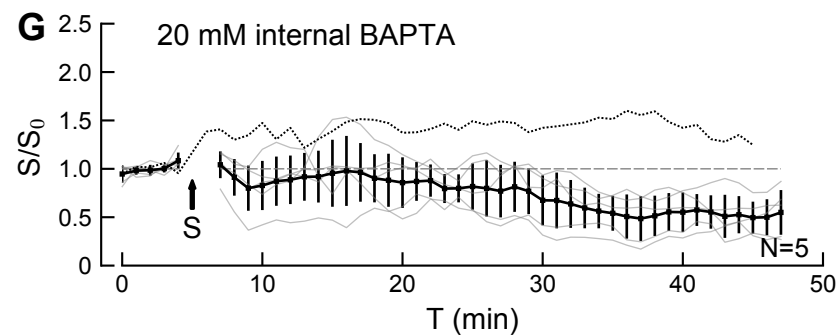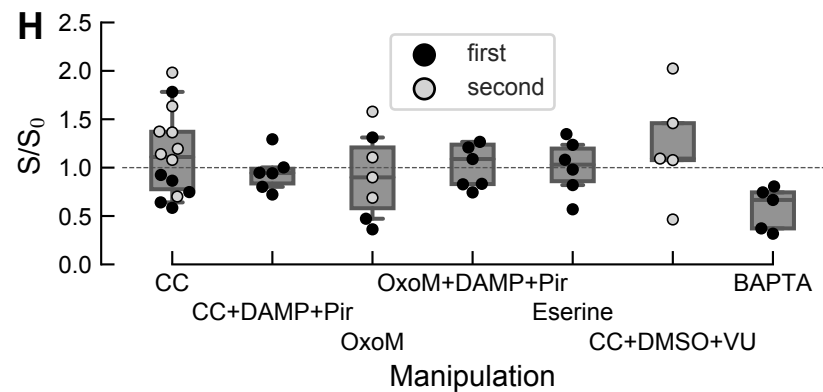



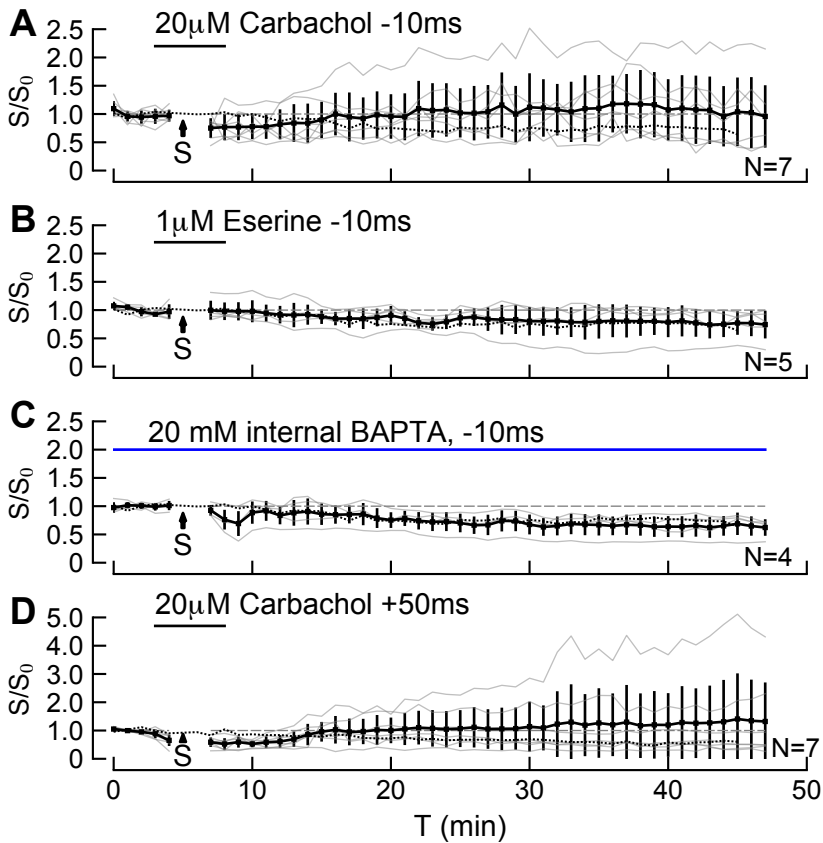

A

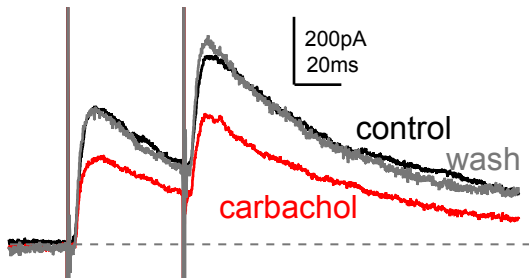

B

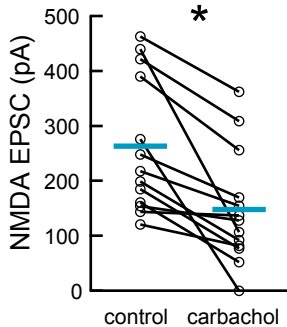

C

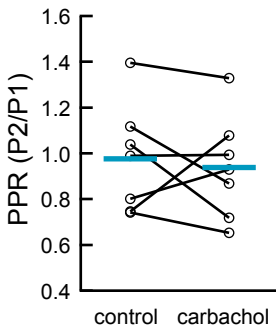

Figure 9

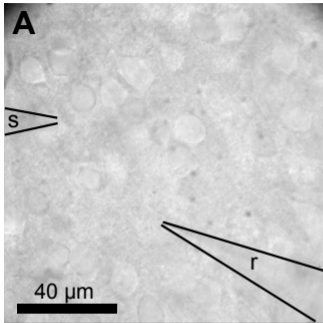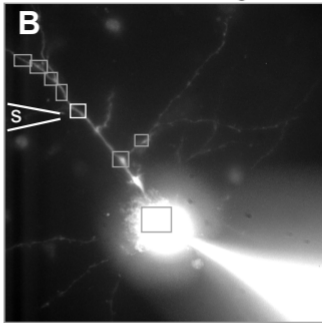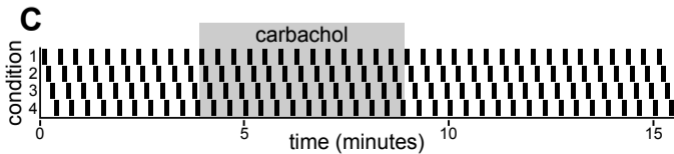

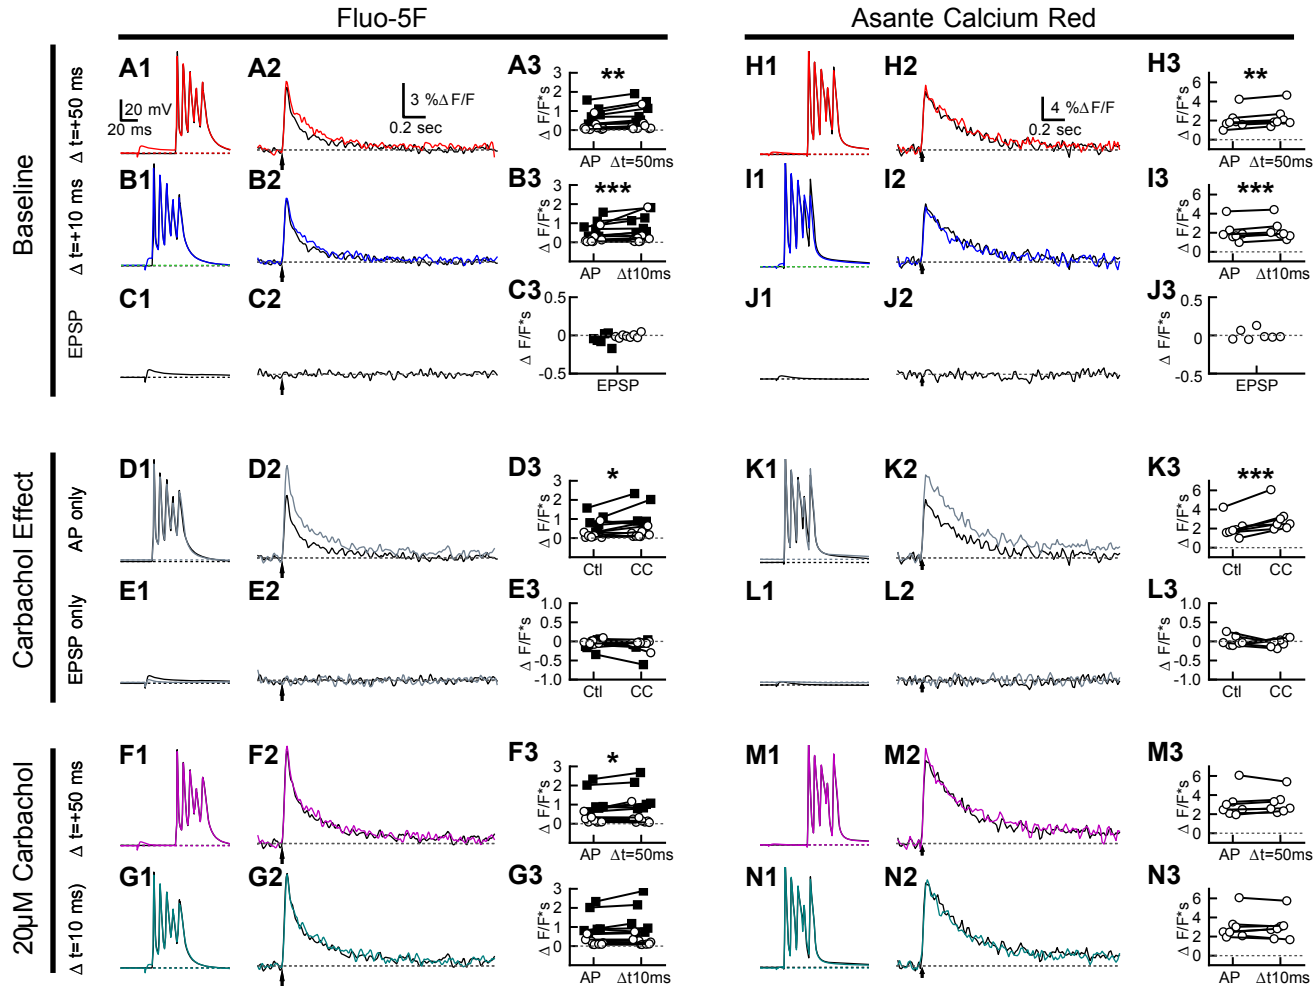

Source: https://www.biorxiv.org/content/10.1101/690446v1.full.pdf
